# Supplementary material for: A cost-effective sequencing method for genetic studies combining high-depth whole exome and low-depth whole genome
Source: PubMed Central journal article supplement (PMC10850497; doi:10.1038/s41525-024-00390-3), 2024-02-07
Supplement: 41525_2024_390_MOESM2_ESM.pdf [file 41525_2024_390_MOESM2_ESM.pdf]

# Supplementary Information

## A cost-effective sequencing method for genetic studies combining high-depth whole exome and low-depth whole genome

Claude Bhérier<sup>1,2,3</sup>, Robert Eveleigh<sup>2,4</sup>, Katerina Trajanoska<sup>1,2,3</sup>, Janick St-Cyr<sup>2</sup>, Antoine Paccard<sup>2</sup>, Praveen Nadukkalam Ravindran<sup>2,3</sup>, Elizabeth Caron<sup>2</sup>, Nimara Bader Asbah<sup>1,2</sup>, Peyton McClelland<sup>1,2,3</sup>, Clare Wei<sup>2,3</sup>, Iris Baumgartner<sup>5,6</sup>, Marc Schindewolf<sup>5,6</sup>, Yvonne Döring<sup>5,6,7</sup>, Danielle Perley<sup>2,4</sup>, François Lefebvre<sup>2,4</sup>, Pierre Lepage<sup>2</sup>, Mathieu Bourgey<sup>8</sup>, Guillaume Bourque<sup>1,2,4</sup>, Jiannis Ragoussis<sup>1,2</sup>, Vincent Mooser<sup>1,2,3</sup>, Daniel Taliun<sup>1,2,3</sup>

<sup>1</sup> Department of Human Genetics, Faculty of Medicine and Health Sciences, McGill University, Montréal, Québec, Canada

<sup>2</sup> Victor Phillip Dahdaleh Institute of Genomic Medicine at McGill University, Montréal, Québec, Canada

<sup>3</sup> Canada Excellence Research Chair in Genomic Medicine, McGill University, Montréal, Québec, Canada

<sup>4</sup> Canadian Centre for Computational Genomics, McGill University, Montréal, Québec, Canada

<sup>5</sup> Division of Angiology, Swiss Cardiovascular Center, Inselspital, Bern University Hospital, University of Bern, Bern, Switzerland

<sup>6</sup> Department for BioMedical Research (DBMR), University of Bern, Switzerland

<sup>7</sup> Institute for Cardiovascular Prevention (IPEK), Ludwig-Maximilians University Munich, Pettenkoferstr 9, 80336, Munich, Germany

<sup>8</sup> Mila - Quebec AI Institute, Montréal, Québec, Canada

Correspondence: [daniel.taliun@mcgill.ca](mailto:daniel.taliun@mcgill.ca)

## Supplementary figures and tables

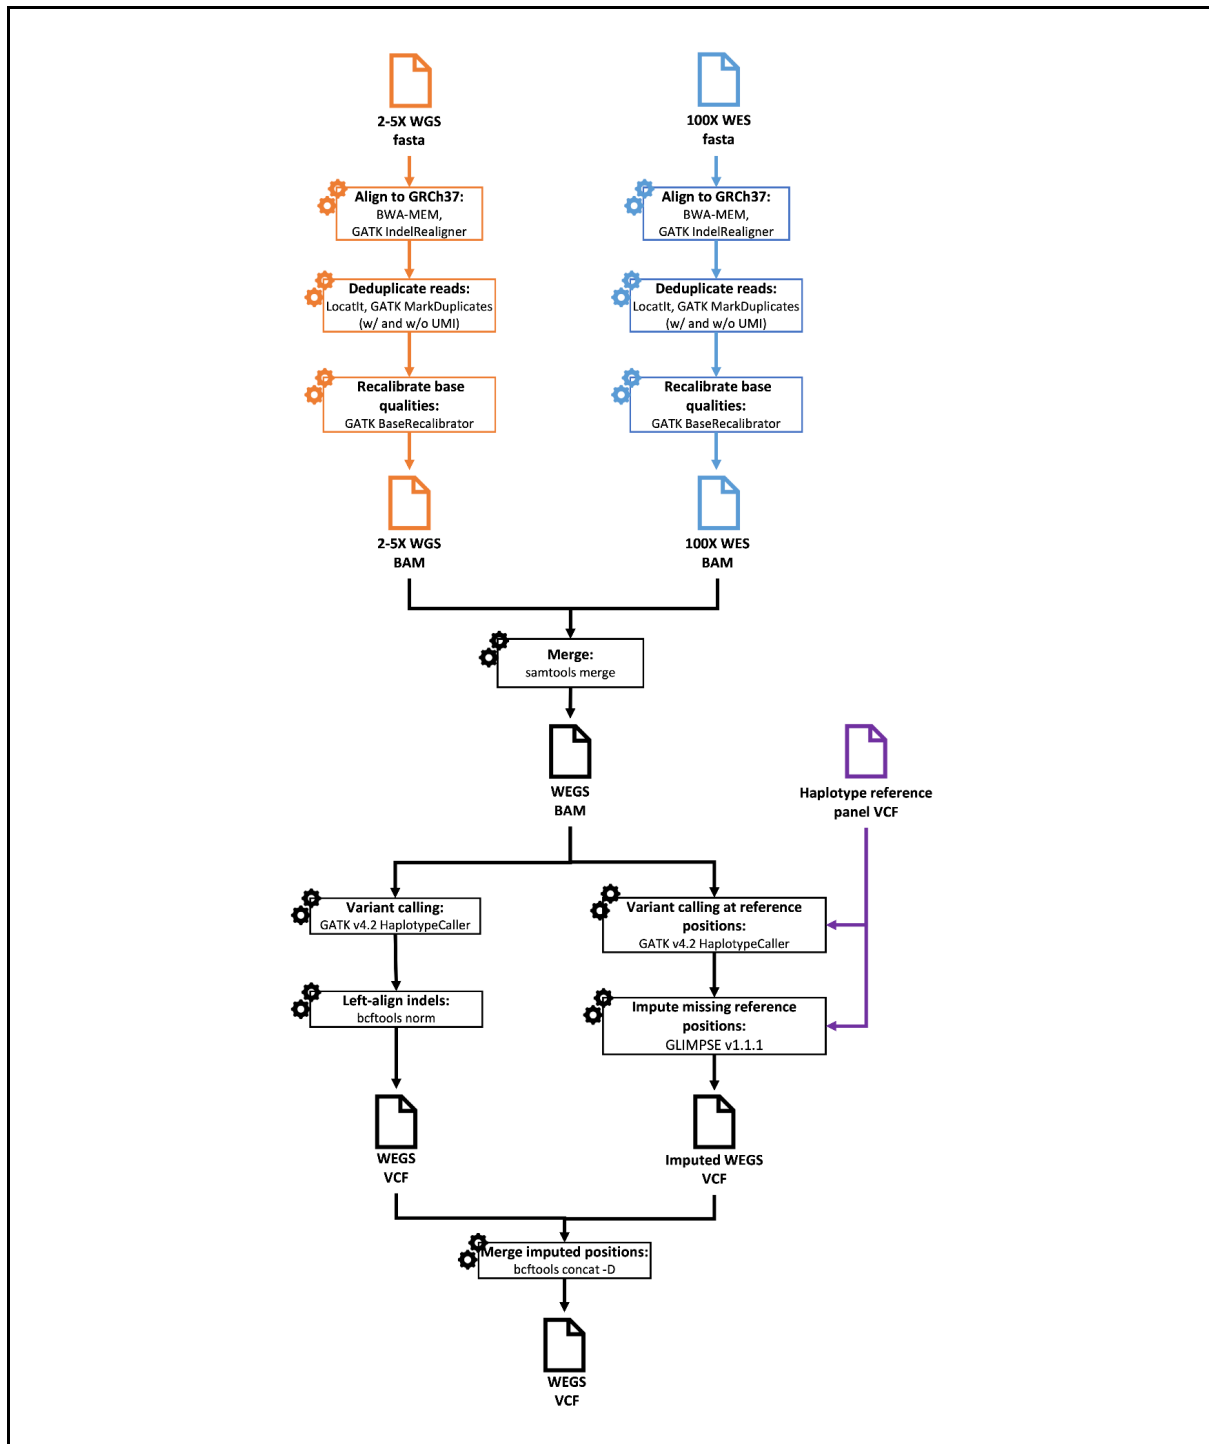

**Supplementary Figure 1. Data processing diagram.** WGS and WES alignment, deduplication and base recalibration steps were performed using GATK best practices. WGS and WES BAM files were then merged using samtools. Merged WEGS data was used for variant calling and imputation with GLIMPSE and local haplotype reference panel. The resulting imputed WEGS VCF was then used to merge imputed positions with WEGS data, hence obtaining the final WEGS VCF.

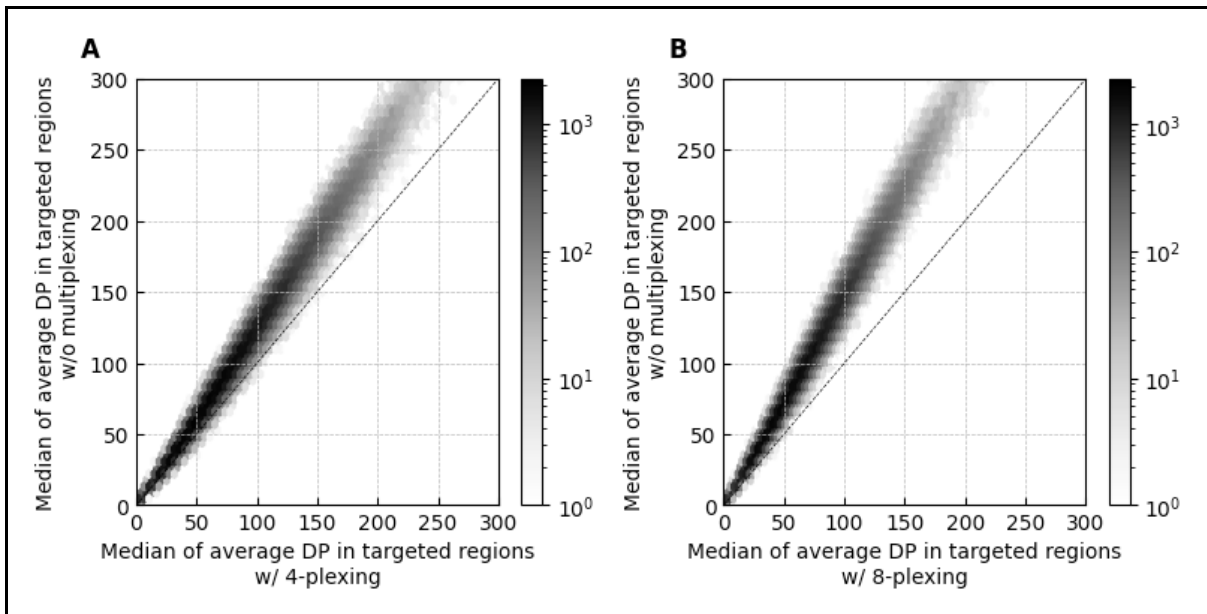

**Supplementary Figure 2. Comparison of average depths of coverage (DP) in individual target regions in experiments without and with multiplexing.** We computed the average depth of coverage (DP) for each target region in Agilent V7 capture in each sequenced individual. DP includes only paired mapped reads and base pairs with minimal Phred-scaled mapping and base qualities of 20. Each point corresponds to a single target region. In total, there were 208,817 non-overlapping autosomal regions. The X-axis shows the median of average DPs in the target region across all individuals sequenced in 4-plex (panel A) and 8-plex (panel B) experiments. The Y-axis shows the median of average DPs in the target region across all individuals sequenced without multiplexing. The darker color represents the higher density of the points. The vertical bar on the right of each panel shows the number of points corresponding to each color. The dotted black line corresponds to the 1:1 ratio between DP in the experiments.

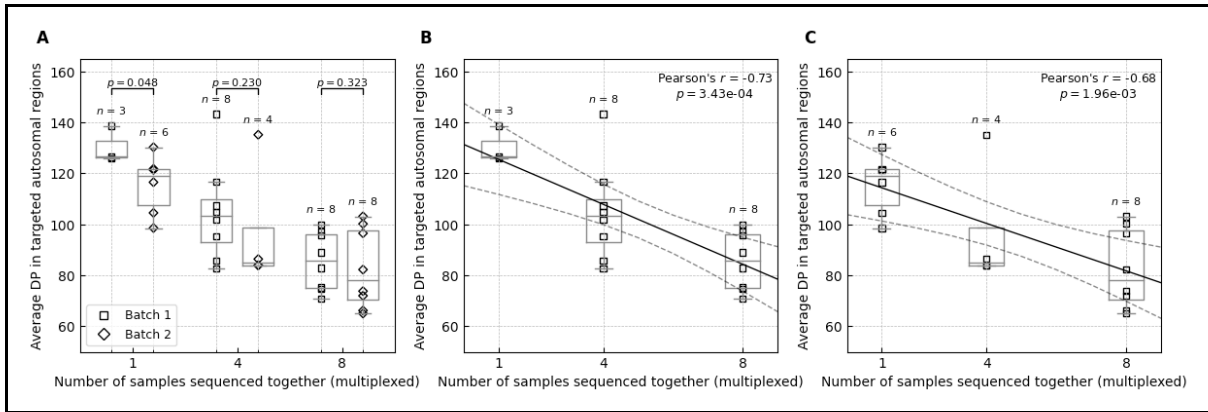

**Supplementary Figure 3. Average depths of coverage across all targeted regions in autosomal chromosomes stratified by library preparation batch.** The average depth of coverage (DP) was computed across target regions in Agilent V7 capture using paired mapped reads and counting only base pairs with minimal Phred-scaled mapping and base qualities of 20. The solid black line corresponds to the linear regression line, and the dashed black lines correspond to the 95% confidence interval. The box bounds the IQR, and Tukey-style whiskers extend to  $1.5 \times$  IQR beyond the box. The horizontal line within the box indicates the median value. Open rectangles and diamonds are data points corresponding to the average DP across individual exome in batches 1 and 2, respectively. A) The DP is stratified by the library preparation batch in experiments without multiplexing, with 4-plexing and 8-plexing experiments. The p-values above each experiment pair correspond to the one-tailed Wilcoxon rank-sum test. B) The DP in the first library preparation batch. C) The DP in the second library preparation batch.

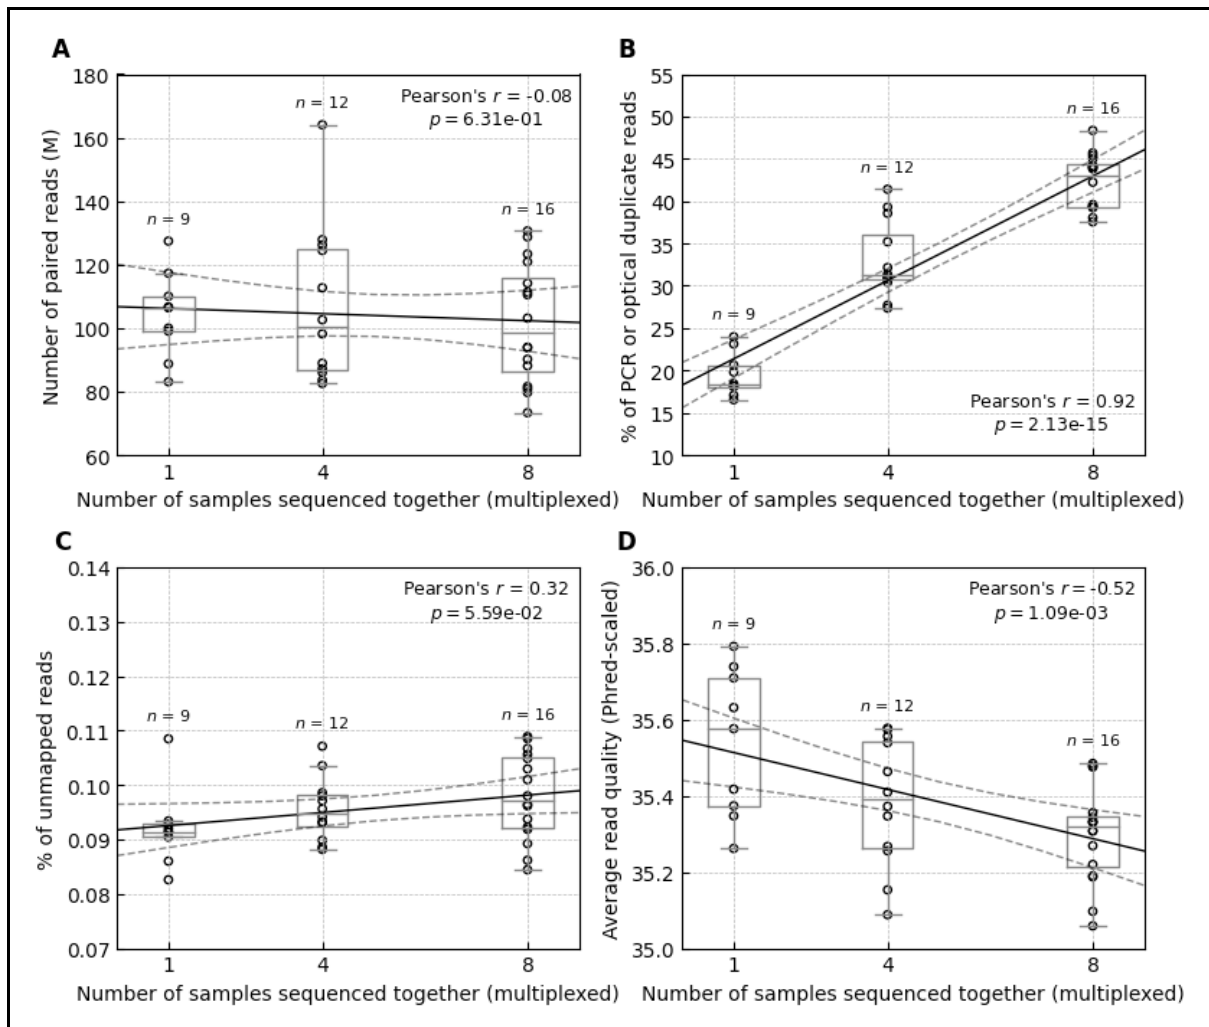

**Supplementary Figure 4. Number of reads in autosomal chromosomes in sequencing experiments with and without multiplexing.** The figure shows only paired reads in autosomal chromosomes, excluding reads that are non-primary or supplementary alignments or failed platform/vendor quality checks. The solid black line corresponds to the linear regression line, and the dashed black lines correspond to the 95% confidence interval. The box bounds the IQR, and Tukey-style whiskers extend to  $1.5 \times$  IQR beyond the box. The horizontal line within the box indicates the median value. Open circles are data points corresponding to the sequenced individual exomes. A) Number of paired reads in millions in sequencing experiments without sample multiplexing and when simultaneously sequencing four (4-plex) and eight (8-plex) samples. B) Percent of reads flagged as PCR or optical duplicates. C) Percent of unmapped reads. D) Average Phred-scaled base quality score across all reads in a sequenced sample.

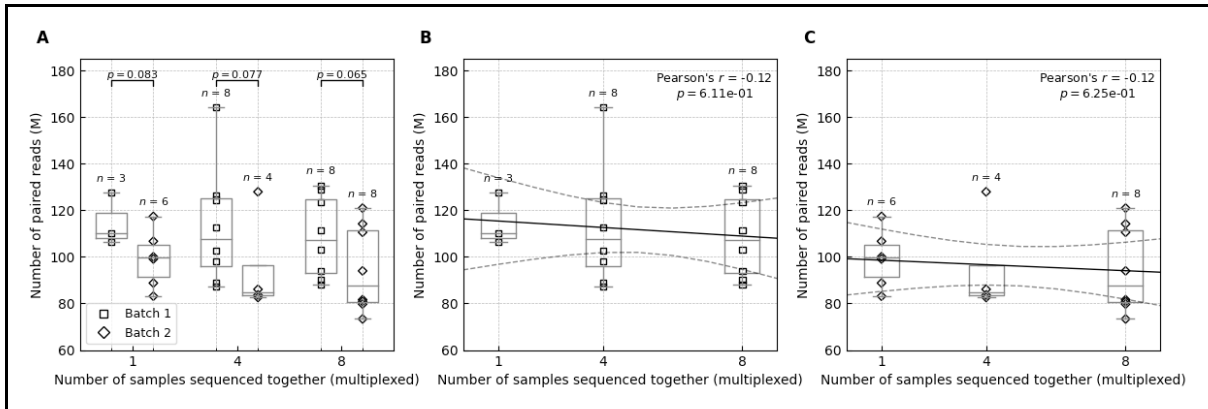

**Supplementary Figure 5. The number of paired reads in autosomal chromosomes stratified by library preparation batch.** The figure shows only paired reads in autosomal chromosomes, excluding reads that are non-primary or supplementary alignments or failed platform/vendor quality checks. The solid black line corresponds to the linear regression line, and the dashed black lines correspond to the 95% confidence interval. The box bounds the IQR, and Tukey-style whiskers extend to  $1.5 \times$  IQR beyond the box. The horizontal line within the box indicates the median value. Open rectangles and diamonds are data points corresponding to the number of paired reads across individual exome in batches 1 and 2, respectively. A) The number of paired reads is stratified by the library preparation batch in experiments without multiplexing, with 4-plexing and 8-plexing experiments. The p-values above each experiment pair correspond to the one-tailed Wilcoxon rank-sum test. B) The number of paired reads in the first library preparation batch. C) The number of paired reads in the second library preparation batch.

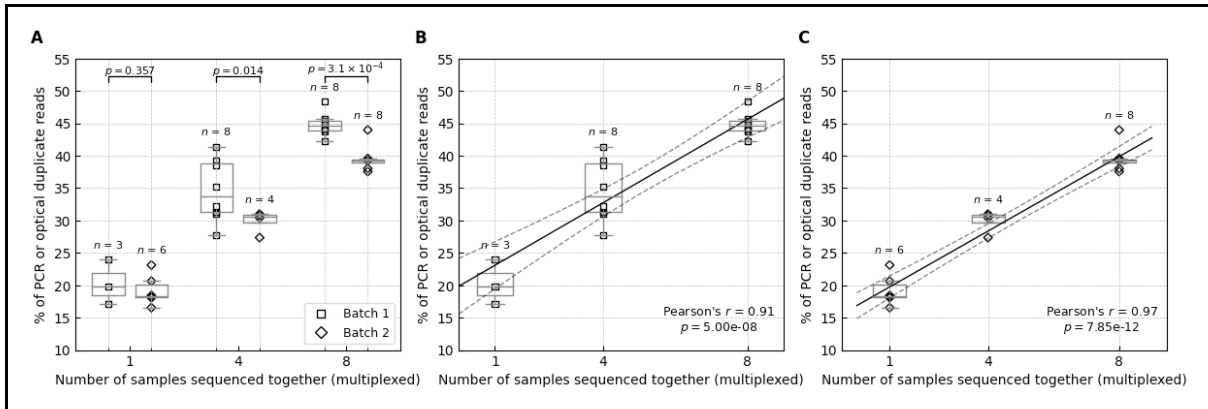

**Supplementary Figure 6. Percent of reads flagged as PCR or optical duplicates in autosomal chromosomes stratified by library preparation batch.** The figure shows only paired reads in autosomal chromosomes, excluding reads that are non-primary or supplementary alignments or failed platform/vendor quality checks. The solid black line corresponds to the linear regression line, and the dashed black lines correspond to the 95% confidence interval. The box bounds the IQR, and Tukey-style whiskers extend to  $1.5 \times$  IQR beyond the box. The horizontal line within the box indicates the median value. Open rectangles and diamonds are data points corresponding to the percent of duplicated reads across individual exomes in batches 1 and 2, respectively. A) The percent of duplicated reads is stratified by the library preparation batch in experiments without multiplexing, with 4-plexing and 8-plexing experiments. The p-values above each experiment pair correspond to the one-tailed Wilcoxon rank-sum test. B) The percent of duplicate reads in the first library preparation batch. C) The percent of duplicate reads in the second library preparation batch.

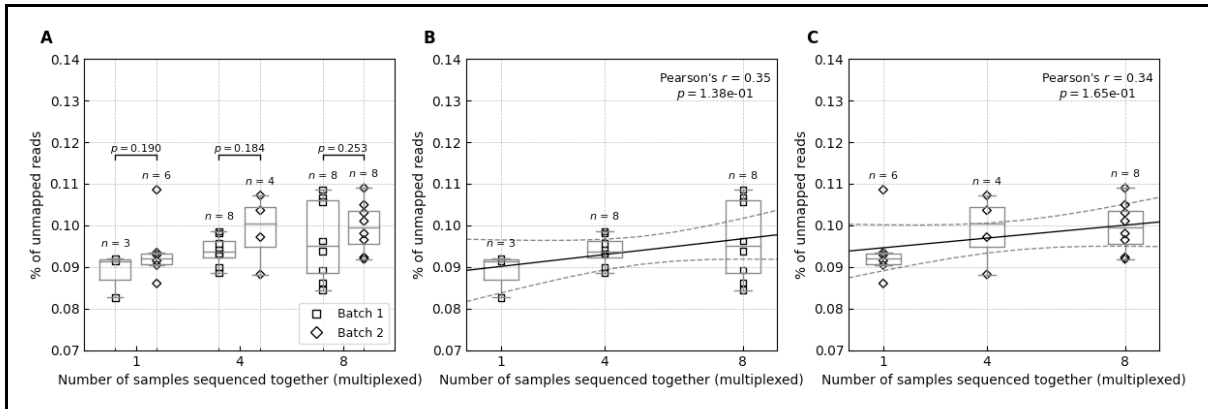

**Supplementary Figure 7. Percent of unmapped reads in autosomal chromosomes stratified by library preparation batch.** The figure shows only paired reads in autosomal chromosomes, excluding reads that are non-primary or supplementary alignments or failed platform/vendor quality checks. The solid black line corresponds to the linear regression line, and the dashed black lines correspond to the 95% confidence interval. The box bounds the IQR, and Tukey-style whiskers extend to  $1.5 \times$  IQR beyond the box. The horizontal line within the box indicates the median value. Open rectangles and diamonds are data points corresponding to the percent of unmapped reads across individual exome in batches 1 and 2, respectively. A) The percent of unmapped reads is stratified by the library preparation batch in experiments without multiplexing, with 4-plexing and 8-plexing experiments. The p-values above each experiment pair correspond to the one-tailed Wilcoxon rank-sum test. B) The percent of unmapped reads in the first library preparation batch. C) The percent of unmapped reads in the second library preparation batch.



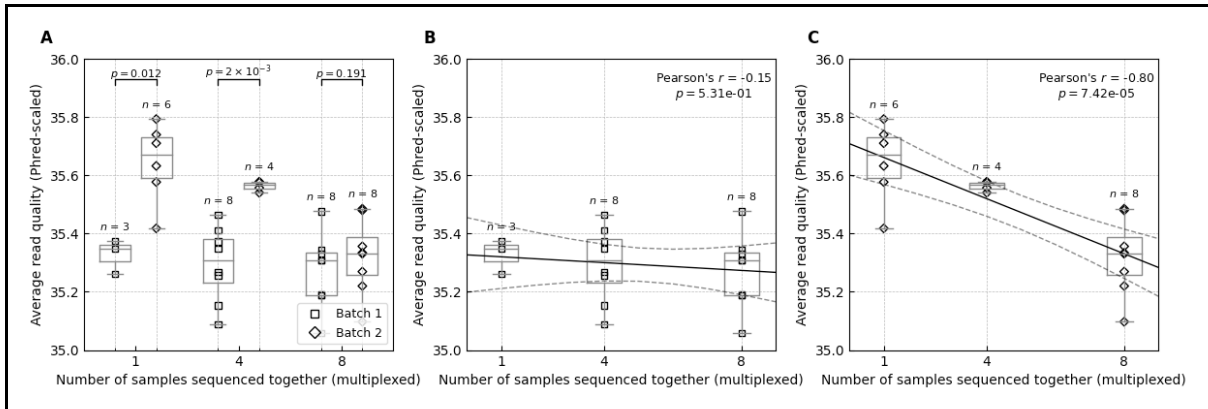

**Supplementary Figure 8. The average quality of reads in autosomal chromosomes stratified by library preparation batch.** The figure shows only paired reads in autosomal chromosomes, excluding reads that are non-primary or supplementary alignments or failed platform/vendor quality checks. The average read quality was computed as the average of Phred-scaled base qualities. The solid black line corresponds to the linear regression line, and the dashed black lines correspond to the 95% confidence interval. The box bounds the IQR, and Tukey-style whiskers extend to  $1.5 \times$  IQR beyond the box. The horizontal line within the box indicates the median value. Open rectangles and diamonds are data points corresponding to the average read quality across individual exome in batches 1 and 2, respectively. A) The average read quality is stratified by the library preparation batch in experiments without multiplexing, with 4-plexing and 8-plexing experiments. The p-values above each experiment pair correspond to the one-tailed Wilcoxon rank-sum test. B) The average read quality in the first library preparation batch. C) The average read quality in the second library preparation batch.

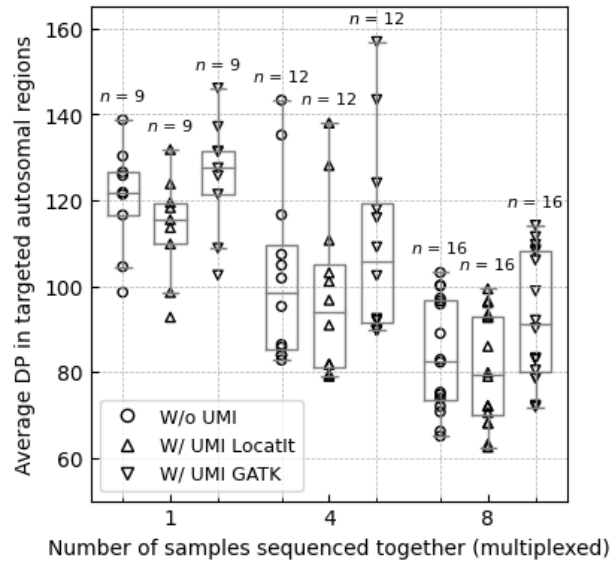

**Supplementary Figure 9. Average depths of coverage across all targeted regions in autosomal chromosomes processed with and without UMI-aware deduplication.** The average depth of coverage (DP) was computed across target regions in Agilent V7 capture using paired mapped reads and counting only base-pairs with minimal Phred-scaled mapping and base qualities of 20. The box bounds the IQR and Tukey-style whiskers extend to a maximum of  $1.5 \times$  IQR beyond the box. The horizontal line within the box indicates median value. Open circles, up-pointing and down-pointing triangles are data points corresponding to the average DP across individual exome processed without, with LocatIt and GATK's UmiAwareMarkDuplicatesWithMateCigar UMI-aware deduplication, respectively.

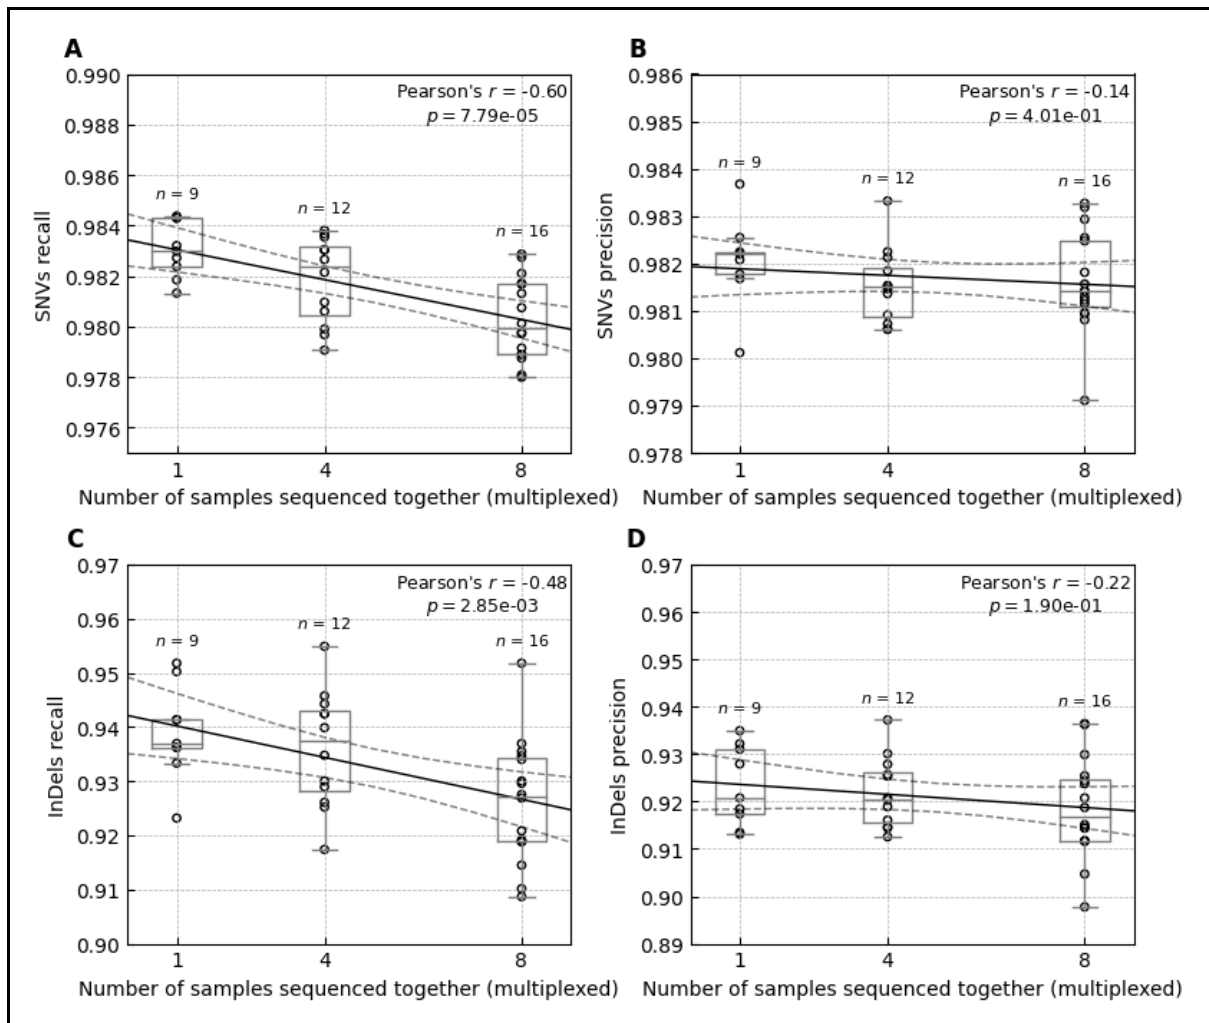

**Supplementary Figure 10. Recall and precision of the SNVs and InDels called in sequencing experiments without and with multiplexing.** The figure represents variant calls inside the target regions in Agilent V7 capture and the GIAB high-confidence regions. The solid black line corresponds to the linear regression line, and the dashed black lines correspond to the 95% confidence interval. The box bounds the IQR, and Tukey-style whiskers extend to  $1.5 \times$  IQR beyond the box. The horizontal line within the box indicates the median value. Open circles are data points corresponding to the sequenced individual exomes. A) Recall rates of the called SNVs. B) Precision of the called SNVs. C) Recall rates of the called InDels. D) Precision of the called InDels.

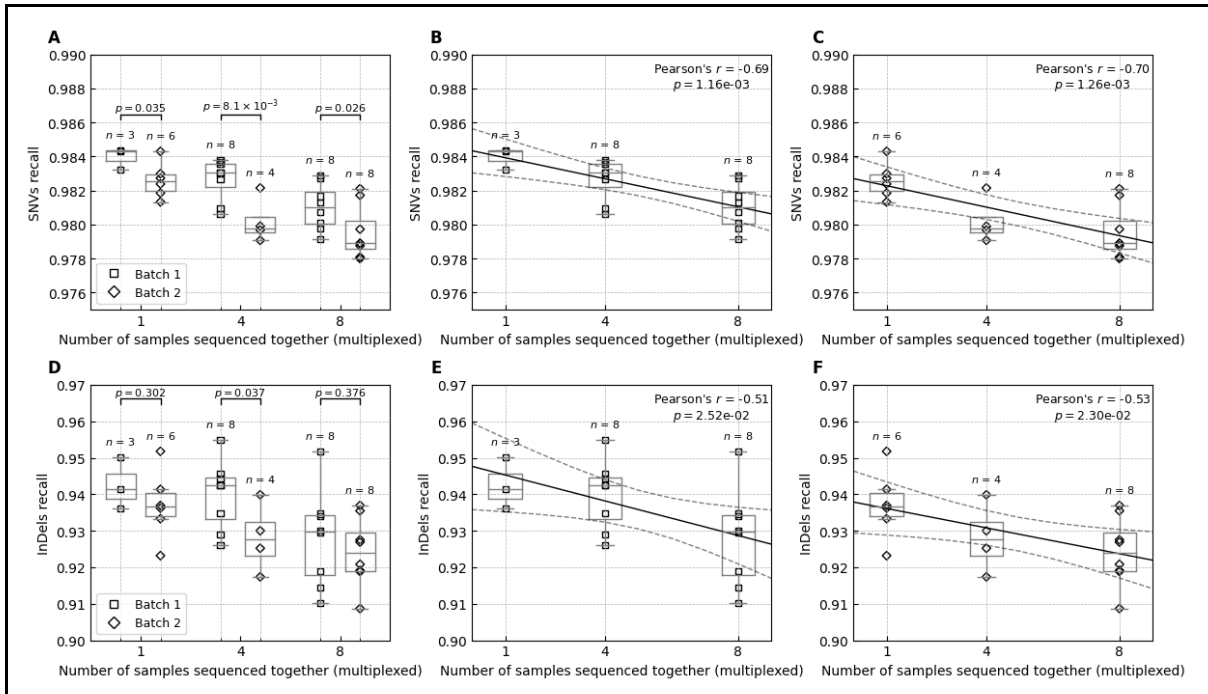

**Supplementary Figure 11. The recall of the SNVs and InDels called in sequencing experiments without and with multiplexing stratified by library preparation batch.** The figure represents variant calls inside the target regions in Agilent V7 capture and the GIAB high-confidence regions. The solid black line corresponds to the linear regression line, and the dashed black lines correspond to the 95% confidence interval. The box bounds the IQR, and Tukey-style whiskers extend to  $1.5 \times$  IQR beyond the box. The horizontal line within the box indicates the median value. Open rectangles and diamonds are data points corresponding to the recall across individual exome in batches 1 and 2, respectively. A) The recall of SNVs is stratified by the library preparation batch in experiments without multiplexing, with 4-plexing and 8-plexing experiments. The p-values above each experiment pair correspond to the one-tailed Wilcoxon rank-sum test. B) The recall of SNVs in the first library preparation batch. C) The recall of SNVs in the second library preparation batch. D) The recall of InDels is stratified by the library preparation batch in experiments without multiplexing, with 4-plexing and 8-plexing experiments. The p-values above each experiment pair correspond to the one-tailed Wilcoxon rank-sum test. E) The recall of InDels in the first library preparation batch. F) The recall of InDels in the second library preparation batch.

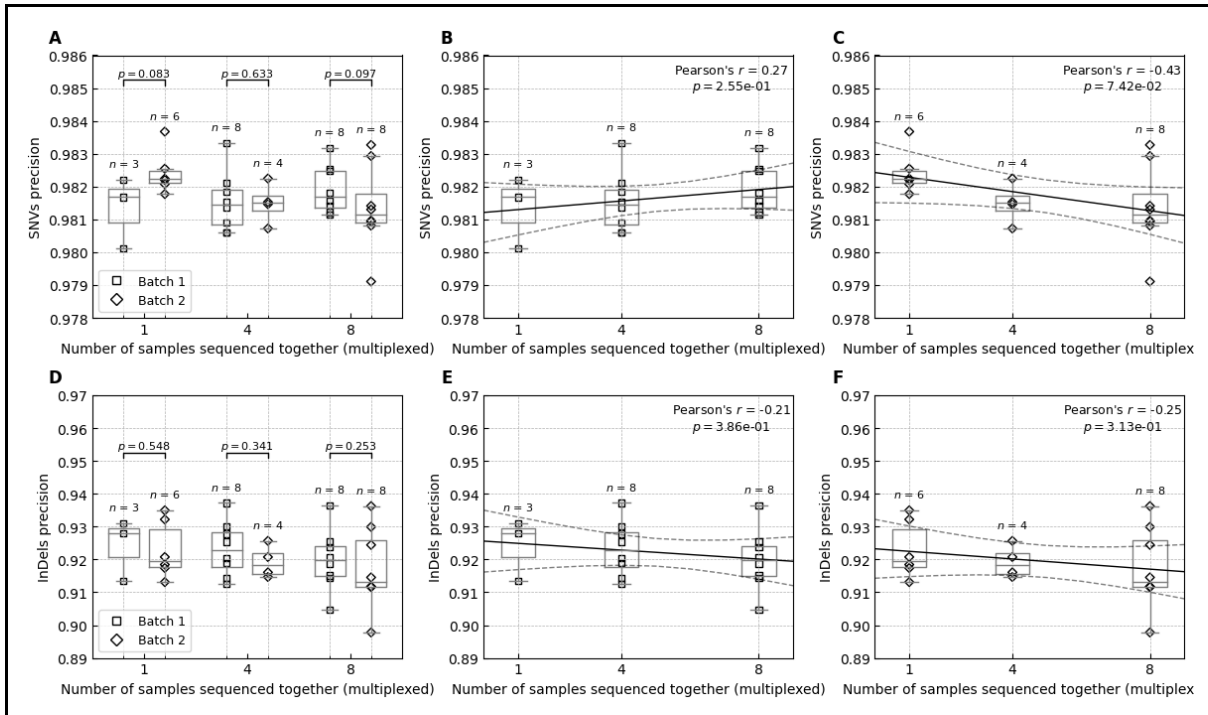

**Supplementary Figure 12. The precision of the SNVs and InDels called in sequencing experiments without and with multiplexing stratified by library preparation batch.** The figure represents variant calls inside the target regions in Agilent V7 capture and the GIAB high-confidence regions. The solid black line corresponds to the linear regression line, and the dashed black lines correspond to the 95% confidence interval. The box bounds the IQR, and Tukey-style whiskers extend to  $1.5 \times$  IQR beyond the box. The horizontal line within the box indicates the median value. Open rectangles and diamonds are data points corresponding to the precision across individual exome in batches 1 and 2, respectively. A) The precision of SNVs is stratified by the library preparation batch in experiments without multiplexing, with 4-plexing and 8-plexing experiments. The p-values above each experiment pair correspond to the one-tailed Wilcoxon rank-sum test. B) The precision of SNVs in the first library preparation batch. C) The precision of SNVs in the second library preparation batch. D) The precision of InDels is stratified by the library preparation batch in experiments without multiplexing, with 4-plexing and 8-plexing experiments. The p-values above each experiment pair correspond to the one-tailed Wilcoxon rank-sum test. E) The precision of InDels in the first library preparation batch. F) The precision of InDels in the second library preparation batch.

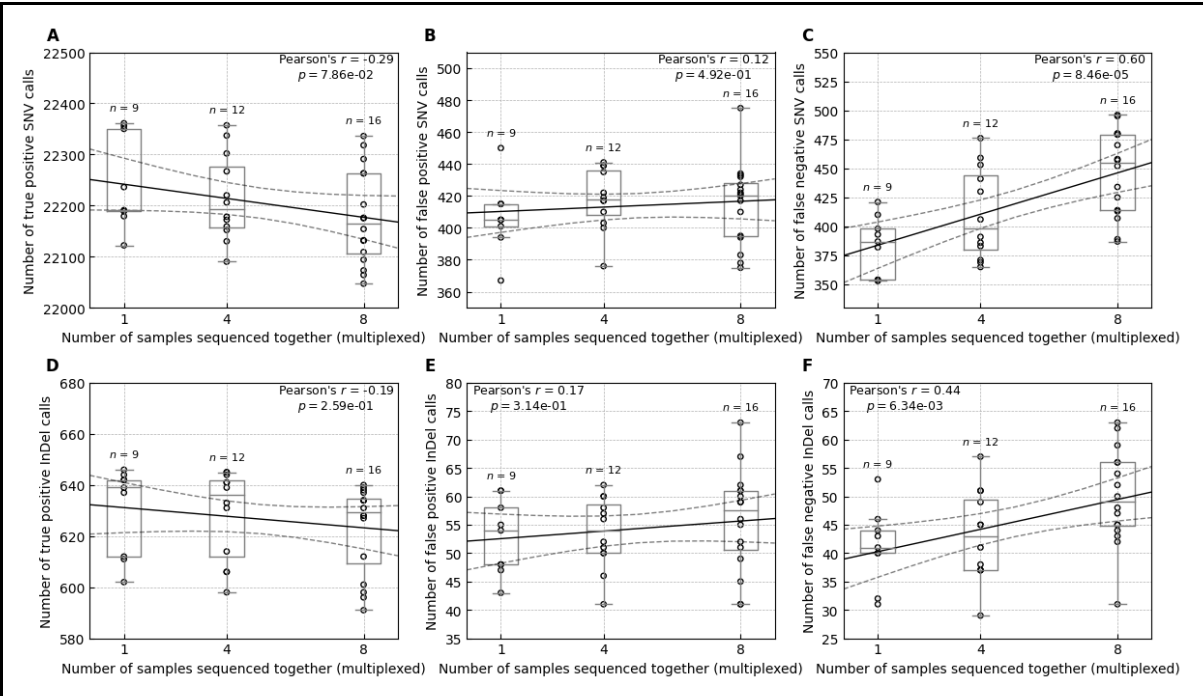

**Supplementary Figure 13. The number of SNV and InDel calls in sequencing experiments without and with multiplexing.** The figure represents variant calls inside the target regions in Agilent V7 capture and the GIAB high-confidence regions. The solid black line corresponds to the linear regression line, and the dashed black lines correspond to 95% confidence interval. The box bounds the IQR, and Tukey-style whiskers extend to  $1.5 \times$  IQR beyond the box. The horizontal line within the box indicates the median value. A) Number of true positive (TP) SNV calls in sequencing experiments without sample multiplexing and when simultaneously sequencing four (4-plex) and eight (8-plex) samples. B) Number of false positive (FP) SNV calls. C) Number of false negative (FN) SNV calls. D) Number of TP InDel calls. E) Number FP InDel calls. F) Number of FN InDel calls.

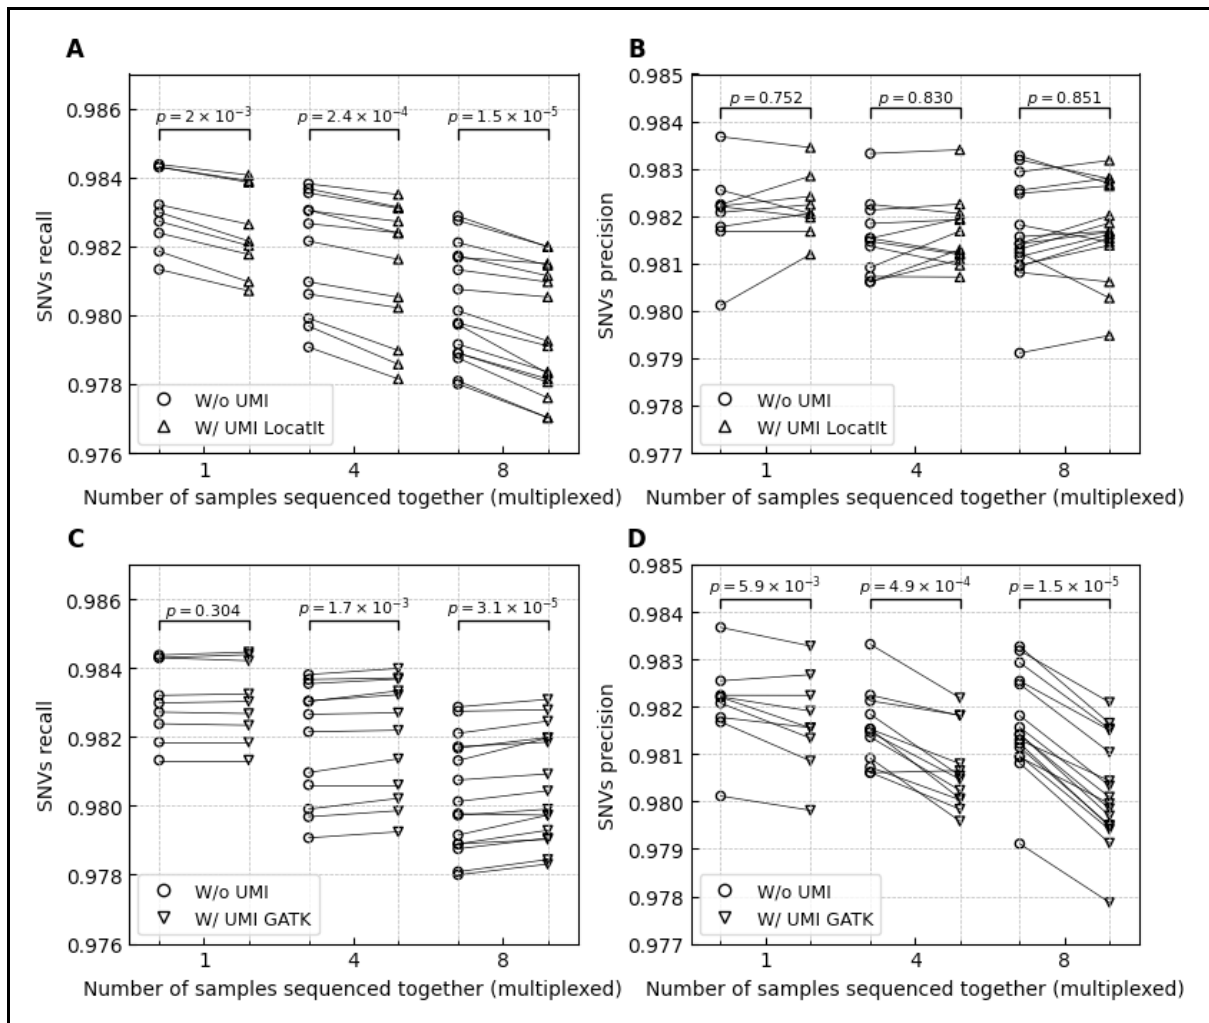

**Supplementary Figure 14. Recall and precision of the single nucleotide variations (SNVs) in sequencing experiments without and with UMI-aware read deduplication.** The figure represents SNV calls inside the target regions in Agilent V7 capture and the GIAB high-confidence regions. Open circles, up-pointing and down-pointing triangles are data points corresponding to the recall and precision in individual exomes processed without, with LocatIt and GATK's UmiAwareMarkDuplicatesWithMateCigar UMI-aware deduplication, respectively. The solid black lines connect pairs of individual exomes with the same underlying sequencing data (i.e. same sequenced sample) but different deduplication approaches. The p-values above experiments with varying levels of multiplexing correspond to the one-tailed Wilcoxon signed-rank test between UMI agnostic and UMI-aware deduplication. A) Recall rates of the called SNVs without UMI-aware compared to UMI-aware deduplication using LocatIt. B) Precision of the called SNVs without UMI-aware compared to UMI-aware deduplication using LocatIt. C) Recall rates of the called SNVs without UMI-aware compared to UMI-aware deduplication using GATK's UmiAwareMarkDuplicatesWithMateCigar. D) Precision of the called SNVs without UMI-aware compared to UMI-aware deduplication using GATK's UmiAwareMarkDuplicatesWithMateCigar.

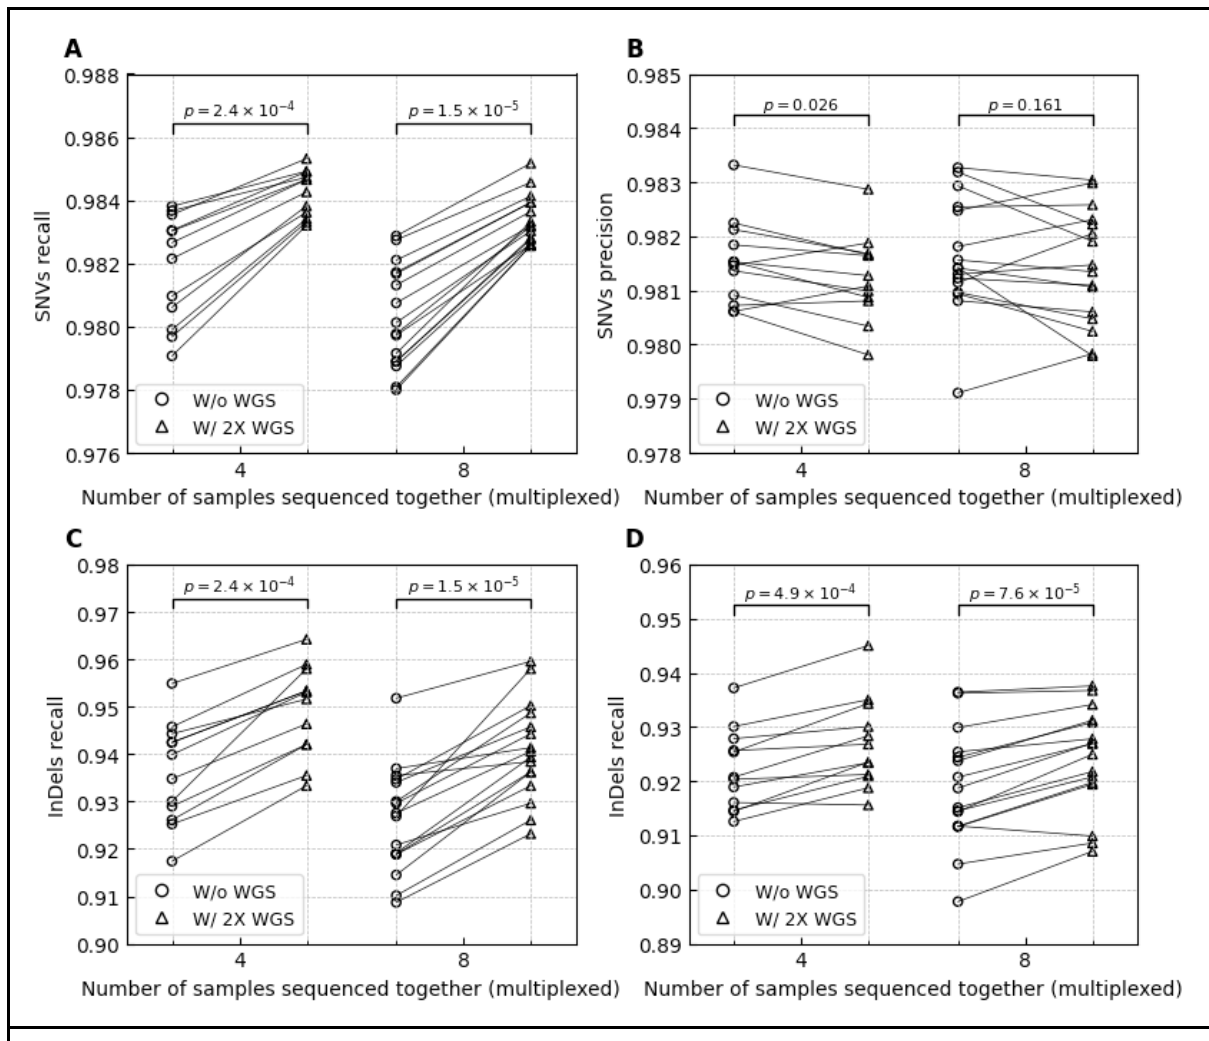

**Supplementary Figure 15. Variant recall and precision rates in WES experiments with multiplexing before and after adding 2X WGS data.** The figure represents variant calls inside the target regions in Agilent V7 capture and the GIAB high-confidence regions. Open circles and up-pointing triangles are data points corresponding to the recall and precision in individual multiplexed WES before and after adding 2X WGS data, respectively. The solid black lines connect pairs of individual exomes with the same underlying WES data (i.e. same sequenced sample). The p-values above experiments with varying levels of multiplexing correspond to the one-tailed Wilcoxon signed-rank test between UMI agnostic and UMI-aware deduplication. A) Recall rates of the called SNVs with and without 2X WGS. B) Precision rates of the called SNVs with and without 2X WGS. C) Recall rates of the called InDels with and without 2X WGS. D) Precision rates of the called InDels with and without 2X WGS.



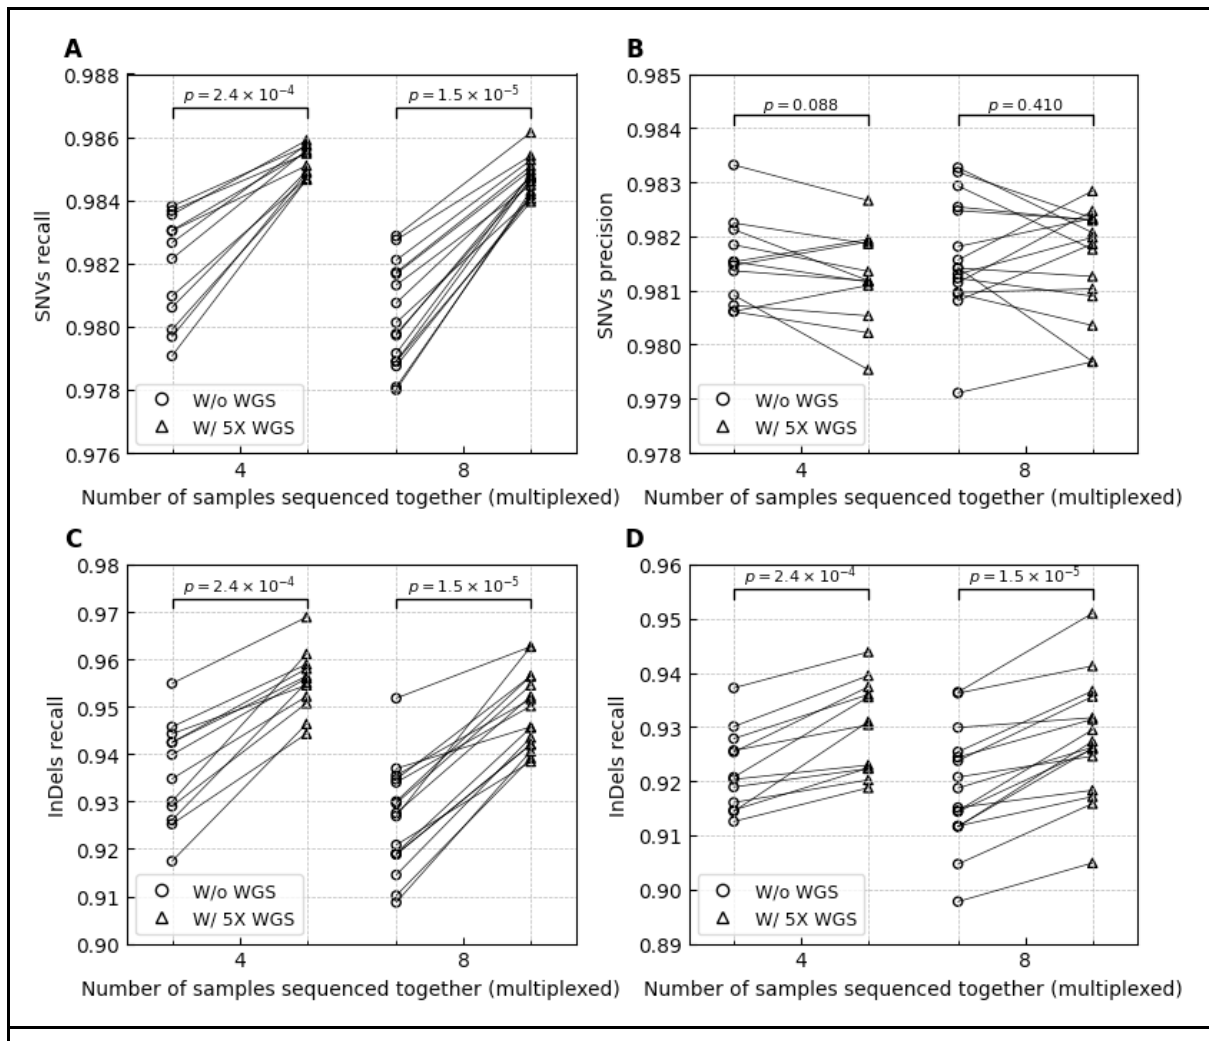

**Supplementary Figure 16. Variant recall and precision rates in WES experiments with multiplexing before and after adding 5X WGS data.** The figure represents variant calls inside the target regions in Agilent V7 capture and the GIAB high-confidence regions. Open circles and up-pointing triangles are data points corresponding to the recall and precision in individual multiplexed WES before and after adding 5X WGS data, respectively. The solid black lines connect pairs of individual exomes with the same underlying WES data (i.e. same sequenced sample). The p-values above experiments with varying levels of multiplexing correspond to the one-tailed Wilcoxon signed-rank test between UMI agnostic and UMI-aware deduplication. A) Recall rates of the called SNVs with and without 5X WGS. B) Precision rates of the called SNVs with and without 5X WGS. C) Recall rates of the called InDels with and without 5X WGS. D) Precision rates of the called InDels with and without 5X WGS.

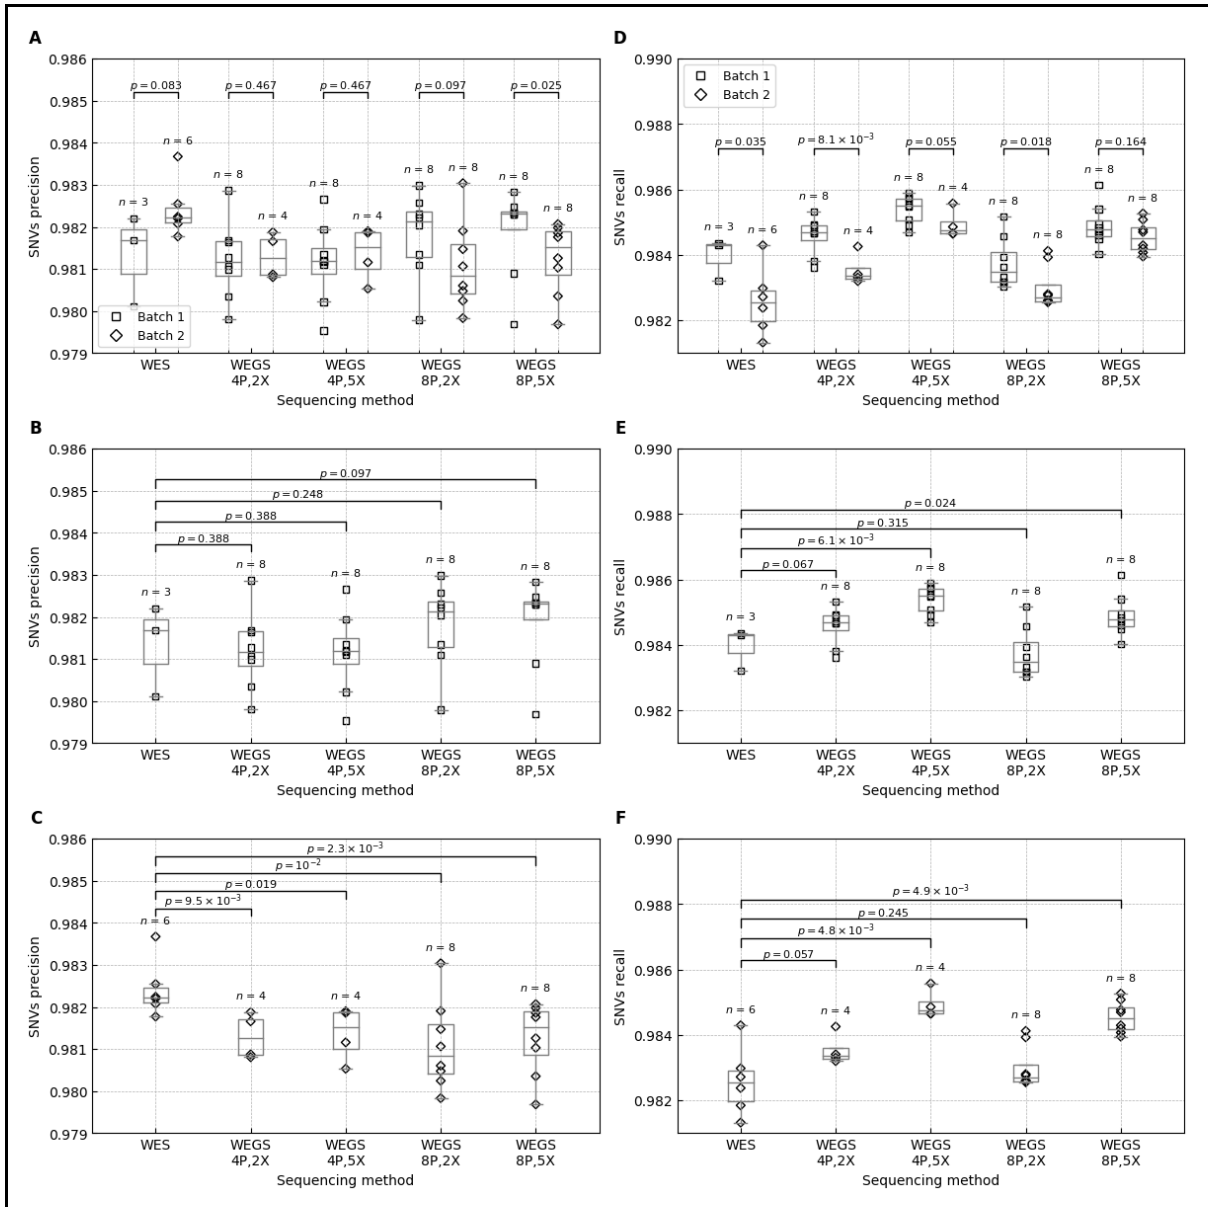

**Supplementary Figure 17. SNVs calling precision and recall rates in no-plexing WES compared to WEGS stratified by library preparation batch.** The figure represents SNV calls inside the target regions in Agilent V7 capture and the GIAB high-confidence regions. The box bounds the IQR, and Tukey-style whiskers extend to  $1.5 \times$  IQR beyond the box. The horizontal line within the box indicates the median value. Open rectangles and diamonds are data points corresponding to the individual WES and WEGS in batches 1 and 2, respectively. The p-values above each pair of batches or sequencing methods correspond to the one-tailed Wilcoxon rank-sum test. A) Precision rates of the called SNVs in batches 1 and 2. B) Precision rates of the called SNVs in batch 1. C) Precision rates of the called SNVs in batch 2. D) Recall rates of the called SNVs in batches 1 and 2. E) Recall rates of the called SNVs in batch 1. F) Recall rates of the called SNVs in batch 2. Supplementary Table 7 shows average values and standard errors.

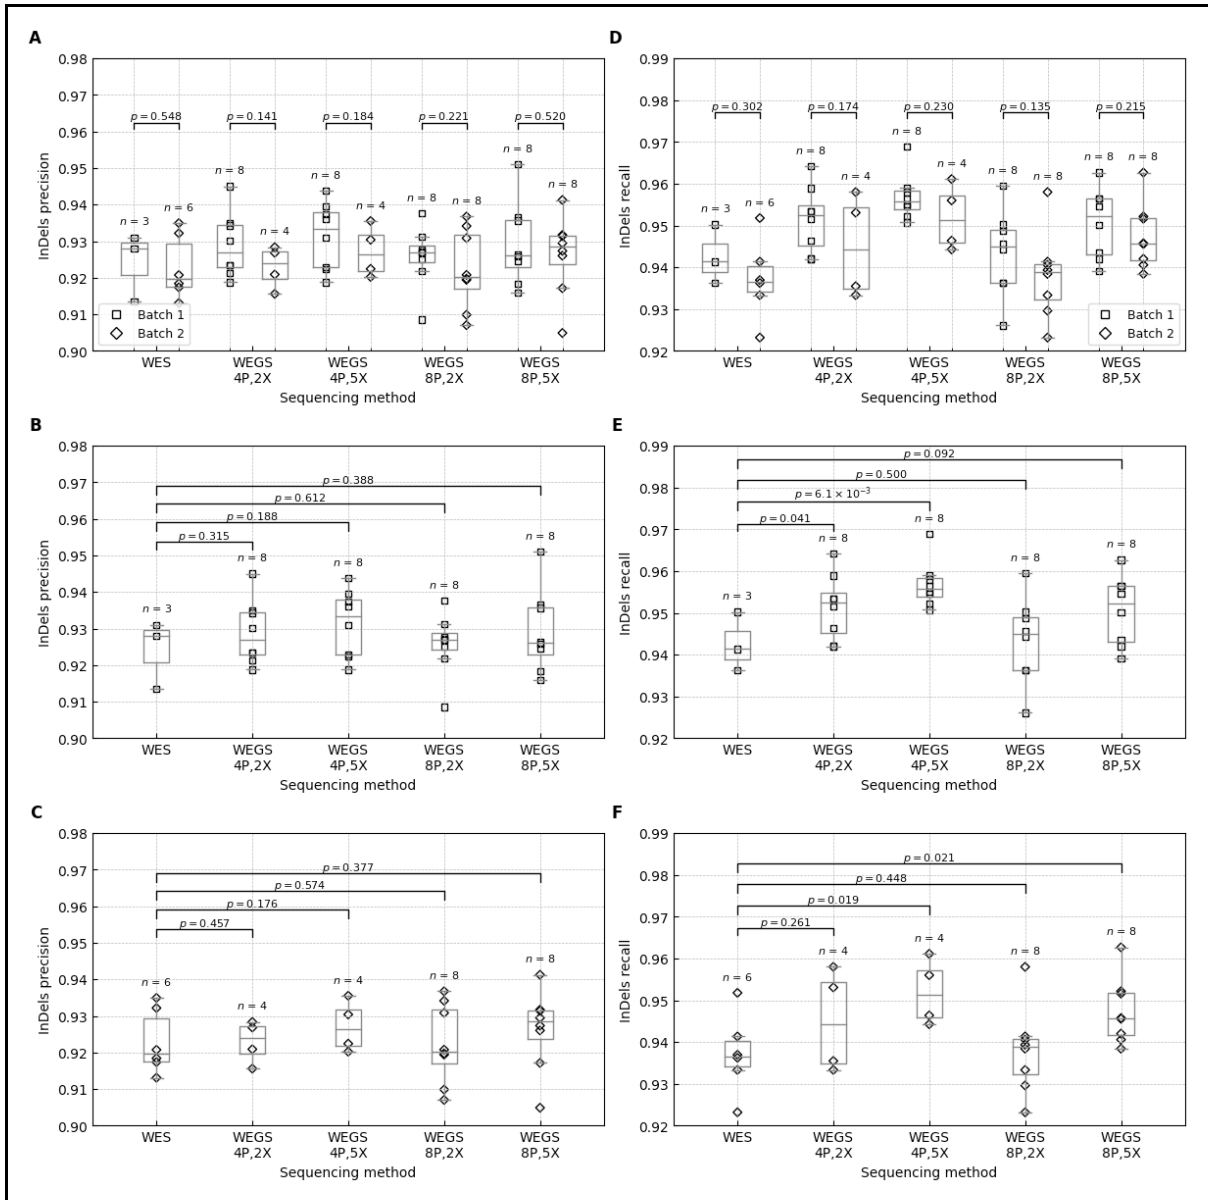

**Supplementary Figure 18. InDel calling precision and recall rates in no-plexing WES compared to WEGS stratified by library preparation batch.** The figure represents InDel calls inside the target regions in Agilent V7 capture and the GIAB high-confidence regions. The box bounds the IQR, and Tukey-style whiskers extend to  $1.5 \times$  IQR beyond the box. The horizontal line within the box indicates the median value. Open rectangles and diamonds are data points corresponding to the individual WES and WEGS in batches 1 and 2, respectively. The p-values above each pair of batches or sequencing methods correspond to the one-tailed Wilcoxon rank-sum test. A) Precision rates of the called InDels in batches 1 and 2. B) Precision rates of the called InDels in batch 1. C) Precision rates of the called InDels in batch 2. D) Recall rates of the called InDels in batches 1 and 2. E) Recall rates of the called InDels in batch 1. F) Recall rates of the called InDels in batch 2. Supplementary Table 7 shows average values and standard errors.

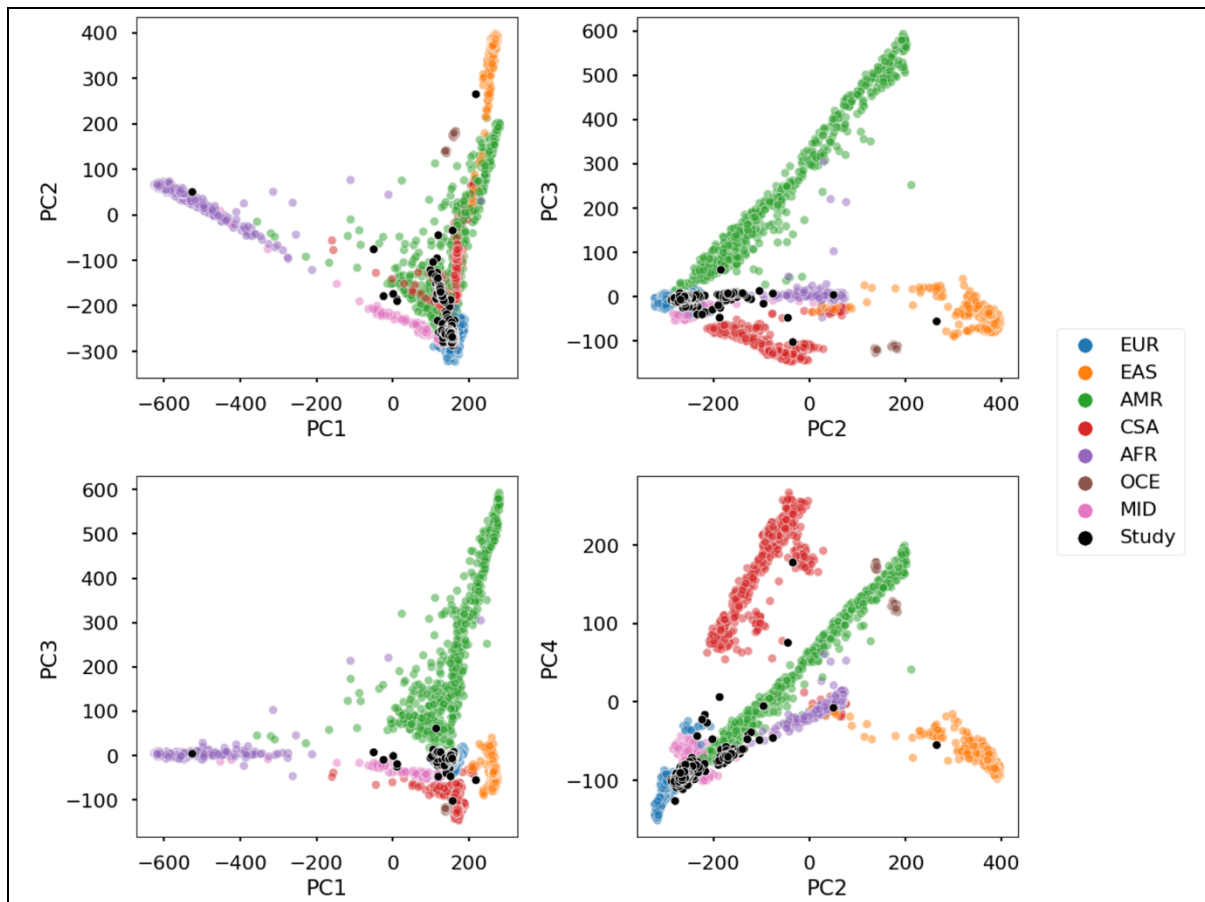

**Supplementary Figure 19. PCA projection of the sequenced PAD patients into the 1000 Genomes Project (1kGP) and Human Genome Diversity Project (HGDP) combined reference panel.** Open black circles represent sequenced individuals. Colored circles represent reference individuals from the 1kGP/HGDP dataset.

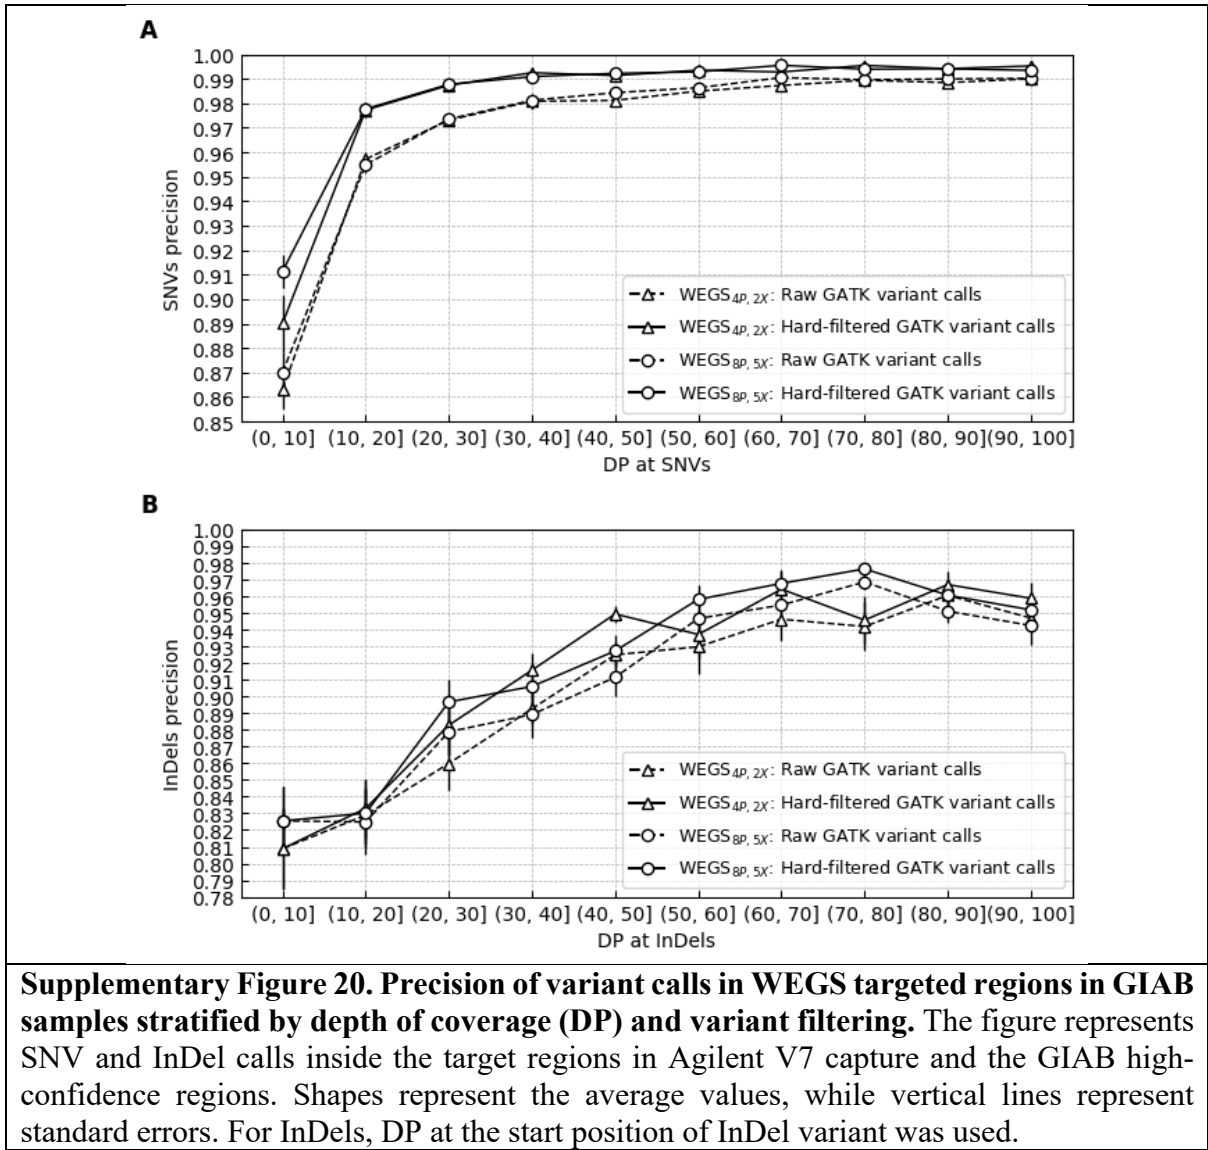

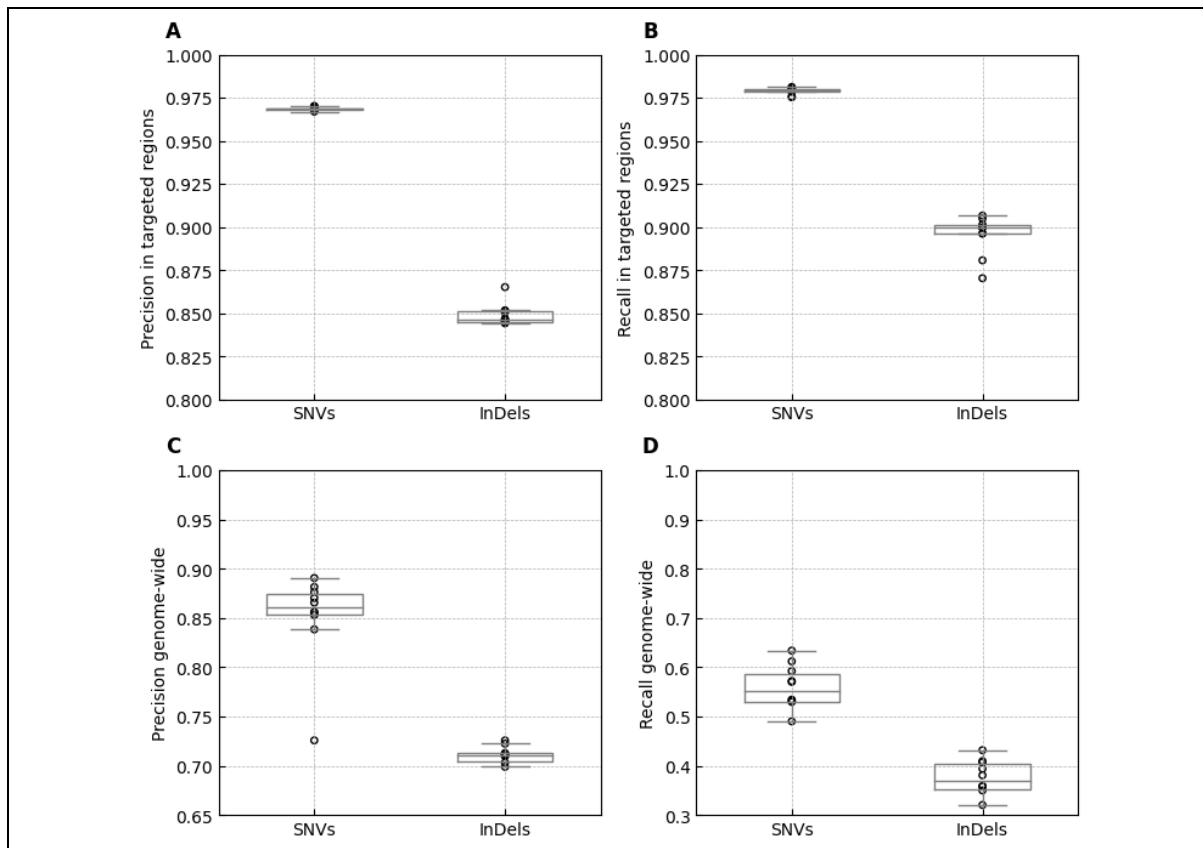

**Supplementary Figure 21. Precision and recall of variant calls in ten replicates of HG002 control sample in PAD study when using WEGs<sub>8P,4X</sub>.** The HG002 sample was used as a control during the sequencing of PAD samples, which resulted in 10 replicates. We calculated the variant recall and precision rates for each HG002 replicate against the GIAB reference data. The box bounds the IQR, and Tukey-style whiskers extend to  $1.5 \times$  IQR beyond the box. The horizontal line within the box indicates the median value. An open circle represents the precision or recall values for an individual HG002 replicate. Supplementary Table 1 lists the mean values and standard errors.

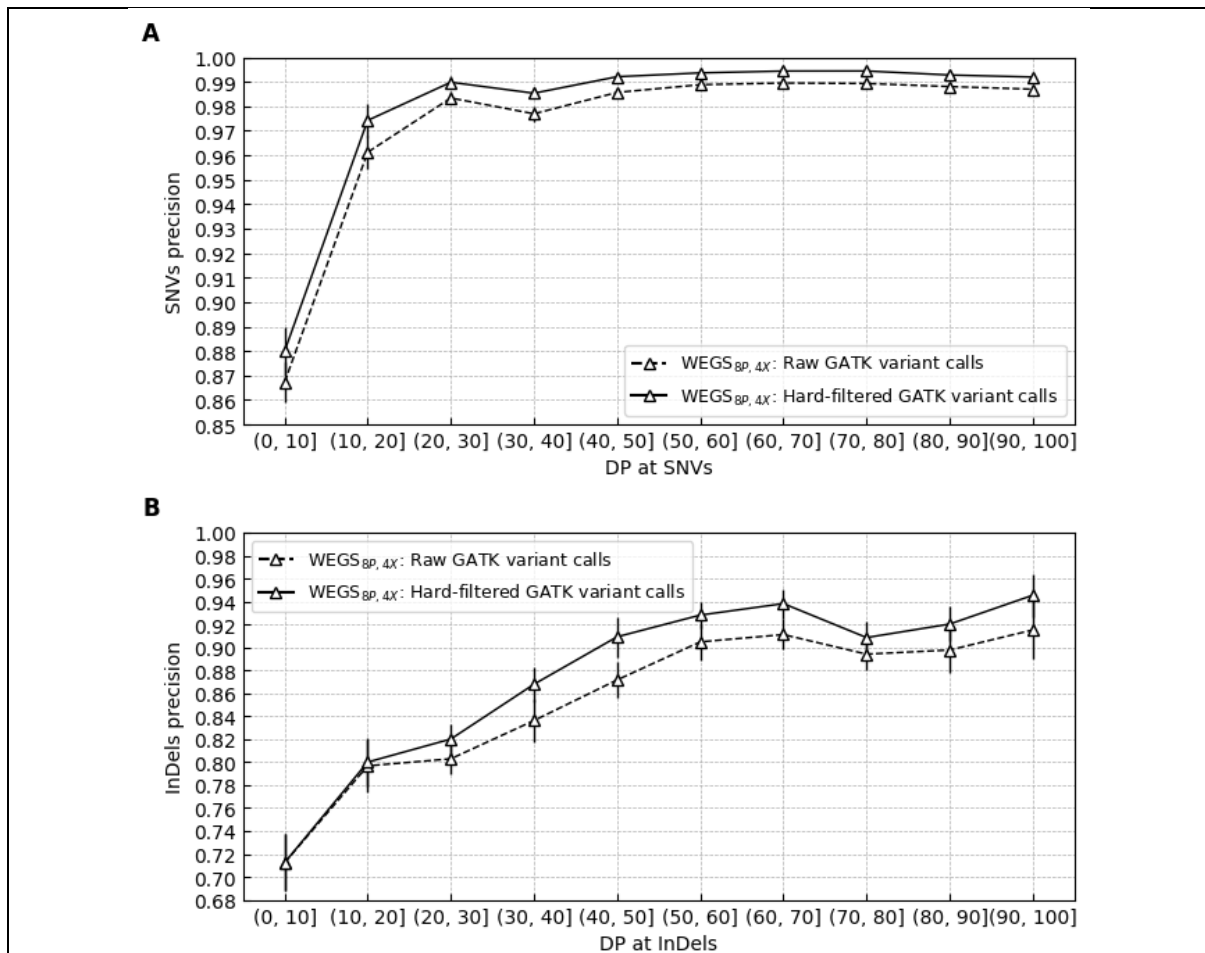

**Supplementary Figure 22.** Precision of variant calls in targeted regions in ten replicates of HG002 control sample in PAD study when using WEGS8P,4X stratified by depth of coverage (DP). The figure represents SNV and InDel calls inside the target regions in Agilent V7 capture and the GIAB high-confidence regions. The HG002 sample was used as a control during the sequencing of PAD samples, which resulted in 10 replicates. We calculated the variant precision rates for each HG002 replicate against the GIAB reference data. Shapes represent the average values, while vertical lines represent standard errors. For InDels, DP at the start position of InDel was used.

**Supplementary Table 1. Precision and recall of variant calls in ten replicates of HG002 control sample in PAD study when using WEGS<sub>8P,4X</sub>.** The HG002 sample was used as a control during the sequencing of PAD samples, which resulted in 10 replicates. We calculated the variant recall and precision rates for each HG002 replicate against the GIAB reference data.

| Category       | SNVs Recall (SE) | SNVs Precision (SE) | InDel Recall (SE) | InDel Precision (SE) |
|----------------|------------------|---------------------|-------------------|----------------------|
| Target regions | 0.9788 (0.0006)  | 0.9685 (0.0003)     | 0.8955 (0.0036)   | 0.8490 (0.0020)      |
| Genome-wide    | 0.5274 (0.0379)  | 0.8513 (0.0148)     | 0.3515 (0.0293)   | 0.7028 (0.0094)      |

**Supplementary Table 2. The average changes in read properties after UMI-aware read deduplication steps relative to the UMI agnostic approach.**

| Number of samples sequenced together (multiplexed) | UMI-aware deduplication tool | Average difference compared to UMI agnostic approach |                                  |                          |                                     |
|----------------------------------------------------|------------------------------|------------------------------------------------------|----------------------------------|--------------------------|-------------------------------------|
|                                                    |                              | % of QC fail reads (SE)                              | % of PCR/optical duplicates (SE) | % of unmapped reads (SE) | Avg. Phred-scaled read quality (SE) |
| 1                                                  | LocatIt                      | 6.45 (0.16)                                          | -1.20 (0.04)                     | -0.068 (0.00223)         | 2.60 (0.12)                         |
| 1                                                  | GATK                         | 0.00 (0.00)                                          | -0.36 (0.01)                     | 0.003 (0.00003)          | 0.35 (0.06)                         |
| 4                                                  | LocatIt                      | 5.19 (0.16)                                          | -1.42 (0.04)                     | -0.069 (0.00159)         | 2.87 (0.05)                         |
| 4                                                  | GATK                         | 0.00 (0.00)                                          | -0.39 (0.01)                     | 0.003 (0.00005)          | 0.49 (0.05)                         |
| 8                                                  | LocatIt                      | 4.38 (0.10)                                          | -1.56 (0.03)                     | -0.069 (0.00175)         | 2.70 (0.14)                         |
| 8                                                  | GATK                         | 0.00 (0.00)                                          | -0.40 (0.01)                     | 0.003 (0.00004)          | 0.57 (0.03)                         |

**Supplementary Table 3. Variant calling in whole exome sequencing experiments with and without multiplexing.** The table represents variant calls inside the target regions in Agilent V7 capture and the GIAB high-confidence regions. TP - true positives, FP - false positives, FN - false negatives.

| Number of samples sequenced together (multiplexed) | SNVs           |                |            |             | InDels             |                    |            |            |           |           |                    |                    |
|----------------------------------------------------|----------------|----------------|------------|-------------|--------------------|--------------------|------------|------------|-----------|-----------|--------------------|--------------------|
|                                                    | N              | TP             | FP         | FN          | Recall             | Precision          | NTP (SE)   | FP         | FN        | Recall    | Precision          |                    |
|                                                    | (SE)           | (SE)           | (SE)       | (SE)        | (SE)               | (SE)               | (SE)       | (SE)       | (SE)      | (SE)      | (SE)               |                    |
| 1                                                  | 22,648<br>(33) | 22,241<br>(30) | 406<br>(7) | 384<br>(8)  | 0.9830<br>(0.0004) | 0.9821<br>(0.0003) | 683<br>(7) | 631<br>(6) | 53<br>(2) | 41<br>(2) | 0.9390<br>(0.0029) | 0.9232<br>(0.0028) |
| 4                                                  | 22,632<br>(28) | 22,214<br>(24) | 418<br>(6) | 411<br>(11) | 0.9818<br>(0.0005) | 0.9815<br>(0.0002) | 682<br>(7) | 629<br>(5) | 54<br>(2) | 43<br>(2) | 0.9360<br>(0.0031) | 0.9220<br>(0.0021) |
| 8                                                  | 22,592<br>(28) | 22,177<br>(23) | 415<br>(6) | 446<br>(9)  | 0.9803<br>(0.0004) | 0.9816<br>(0.0003) | 679<br>(6) | 623<br>(4) | 56<br>(2) | 50<br>(2) | 0.9261<br>(0.0028) | 0.9186<br>(0.0027) |

**Supplementary Table 4. The average number of SNVs missed in multiplexing experiments but correctly identified across all no-plexing experiments.** For each multiplexing experiment, we computed the number of false negative (FN) SNV calls that were true positive (TP) in all three no-plexing experiments for the corresponding individual.

|                     | TP across all no-plexing WES |                  |
|---------------------|------------------------------|------------------|
|                     | All N (SE)                   | Higher DP N (SE) |
| FN in 4-plexing WES | 45 (6)                       | 40 (6)           |
| FN in 8-plexing WES | 65 (6)                       | 61 (6)           |



**Supplementary Table 5. The average changes in SNV calling in whole exome sequencing experiments with UMI-aware read deduplication relative to the UMI agnostic approach.** The table represents SNV calls inside the target regions in Agilent V7 capture and the GIAB high-confidence regions. The star symbols represent statistically significant differences when using a one-tailed Wilcoxon signed-rank test: \* - P-value < 0.05, \*\* - P-value < 0.01, \*\*\* - P-value < 0.001.

| Number of samples sequenced together (multiplexed) | UMI-aware deduplication tool | N (SE)      | TP (SE)     | FP (SE)    | FN (SE)    | Recall (SE)          | Precision (SE)       |
|----------------------------------------------------|------------------------------|-------------|-------------|------------|------------|----------------------|----------------------|
| 1                                                  | LocatIt                      | -17 (3) **  | -14 (1) **  | -4 (4)     | 14 (1) **  | -0.0006 (0.0001) **  | 0.0002 (0.0002)      |
| 1                                                  | GATK                         | 9 (3) **    | 0 (0)       | 8 (2) **   | -0 (0)     | 0.0000 (0.0000)      | -0.0004 (0.0001) **  |
| 4                                                  | LocatIt                      | -16 (3) *** | -13 (2) *** | -3 (3)     | 13 (2) *** | -0.0006 (0.0001) *** | 0.0001 (0.0001)      |
| 4                                                  | GATK                         | 24 (3) ***  | 4 (1) **    | 20 (3) *** | -4 (1) **  | 0.0002 (<0.0001) **  | -0.0009 (0.0001) *** |
| 8                                                  | LocatIt                      | -20 (4) *** | -17 (2) *** | -2 (3)     | 17 (2) *** | -0.0008 (0.0001) *** | 0.0001 (0.0001)      |
| 8                                                  | GATK                         | 39 (2) ***  | 6 (1) ***   | 33 (2) *** | -6 (1) *** | 0.0003 (<0.0001) *** | -0.0014 (0.0001) *** |

**Supplementary Table 6. The average changes in SNVs and InDels calling in whole exome sequencing experiments when adding additional whole genome sequencing reads relative to pure whole exome sequencing experiments.** The table represents SNV and InDel calls inside the target regions in Agilent V7 capture and the GIAB high-confidence regions. The star symbols represent statistically significant differences when using a one-tailed Wilcoxon signed-rank test: \* - P-value < 0.05, \*\* - P-value < 0.01, \*\*\* - P-value < 0.001.

| Number of samples sequenced together (multiplexed) | WGS DP | SNVs        |             |         |              |                     |                    | InDels     |            |            |             |                     |                     |
|----------------------------------------------------|--------|-------------|-------------|---------|--------------|---------------------|--------------------|------------|------------|------------|-------------|---------------------|---------------------|
|                                                    |        | N (SE)      | TP (SE)     | FP (SE) | FN (SE)      | Recall (SE)         | Precision (SE)     | N (SE)     | TP (SE)    | FP (SE)    | FN (SE)     | Recall (SE)         | Precision (SE)      |
| 4                                                  | 2X     | 62 (8) ***  | 54 (7) ***  | 8 (3) * | -54 (7) ***  | 0.0024 (0.0003) *** | -0.0003 (0.0001) * | 6 (1) **   | 9 (1) ***  | -3 (1) **  | -9 (1) ***  | 0.0133 (0.0015) *** | 0.0049 (0.0010) *** |
| 8                                                  | 2X     | 76 (6) ***  | 70 (5) ***  | 6 (4)   | -70 (5) ***  | 0.0031 (0.0002) *** | -0.0002 (0.0002)   | 6 (2) ***  | 10 (1) *** | -3 (1) *** | -10 (1) *** | 0.0146 (0.0017) *** | 0.0055 (0.0009) *** |
| 4                                                  | 5X     | 85 (9) ***  | 77 (9) ***  | 8 (4) * | -77 (9) ***  | 0.0034 (0.0004) *** | -0.0003 (0.0002)   | 8 (1) ***  | 13 (1) *** | -5 (1) *** | -13 (1) *** | 0.0192 (0.0020) *** | 0.0080 (0.0013) *** |
| 8                                                  | 5X     | 104 (8) *** | 100 (7) *** | 3 (5)   | -100 (7) *** | 0.0044 (0.0003) *** | -0.0001 (0.0002)   | 10 (2) *** | 15 (1) *** | -6 (1) *** | -15 (1) *** | 0.0229 (0.0018) *** | 0.0092 (0.0011) *** |

**Supplementary Table 7. Average variant recall and precision rates in no-plexing WES and WEGS.** The table represents variant calls inside the target regions in Agilent V7 capture and the GIAB high-confidence regions. The star symbols represent statistically significant differences between WES and WEGS when using a one-tailed Wilcoxon rank-sum test: \* - P-value < 0.05, \*\* - P-value < 0.01, \*\*\* - P-value < 0.001. WEGS values in bold font are higher than the corresponding values in WES.

| Sequencing method     | Number of samples sequenced together (multiplexed) | WGS DP | SNVs                      |                  | InDels                    |                         |
|-----------------------|----------------------------------------------------|--------|---------------------------|------------------|---------------------------|-------------------------|
|                       |                                                    |        | Recall (SE)               | Precision (SE)   | Recall (SE)               | Precision (SE)          |
| WES                   | 1                                                  | –      | 0.9830 (0.0004)           | 0.9821 (0.0003)  | 0.9390 (0.0029)           | 0.9232 (0.0028)         |
| WEGS <sub>4P,2X</sub> | 4                                                  | 2      | <b>0.9842 (0.0002)**</b>  | 0.9812 (0.0002)* | <b>0.9493 (0.0028)*</b>   | <b>0.9269 (0.0024)</b>  |
| WEGS <sub>4P,5X</sub> | 4                                                  | 5      | <b>0.9852 (0.0001)***</b> | 0.9812 (0.0002)* | <b>0.9552 (0.0019)***</b> | <b>0.9300 (0.0024)*</b> |
| WEGS <sub>8P,2X</sub> | 8                                                  | 2      | <b>0.9834 (0.0002)</b>    | 0.9814 (0.0003)  | <b>0.9407 (0.0026)</b>    | <b>0.9240 (0.0024)</b>  |
| WEGS <sub>8P,5X</sub> | 8                                                  | 5      | <b>0.9847 (0.0001)***</b> | 0.9816 (0.0002)  | <b>0.9490 (0.0020)**</b>  | <b>0.9277 (0.0027)</b>  |

**Supplementary Table 8. Average variant recall and precision rates in no-plexing WES and WEGS stratified by library preparation batch.** The star symbols represent statistically significant differences between WES and WEGS in the same batch when using a one-tailed Wilcoxon rank-sum test: \* - P-value < 0.05, \*\* - P-value < 0.01, \*\*\* - P-value < 0.001. WEGS values in bold font are higher than the corresponding values in WES in the same batch.

| Batch | Label                 | Number of samples sequenced together (multiplexed) | WGS DP | SNVs                     |                        | InDels                   |                        |
|-------|-----------------------|----------------------------------------------------|--------|--------------------------|------------------------|--------------------------|------------------------|
|       |                       |                                                    |        | Recall (SE)              | Precision (SE)         | Recall (SE)              | Precision (SE)         |
| 1     | WES                   | 1                                                  | 0      | 0.9840 (0.0004)          | 0.9813 (0.0006)        | 0.9426 (0.0041)          | 0.9241 (0.0054)        |
| 1     | WEGS <sub>4P,2X</sub> | 4                                                  | 2      | <b>0.9846 (0.0002)</b>   | 0.9812 (0.0003)        | <b>0.9515 (0.0028)*</b>  | <b>0.9289 (0.0031)</b> |
| 1     | WEGS <sub>4P,5X</sub> | 4                                                  | 5      | <b>0.9854 (0.0002)**</b> | 0.9811 (0.0003)        | <b>0.9569 (0.0020)**</b> | <b>0.9315 (0.0032)</b> |
| 1     | WEGS <sub>8P,2X</sub> | 8                                                  | 2      | 0.9838 (0.0003)          | <b>0.9818 (0.0004)</b> | <b>0.9434 (0.0036)</b>   | <b>0.9257 (0.0030)</b> |
| 1     | WEGS <sub>8P,5X</sub> | 8                                                  | 5      | <b>0.9849 (0.0002)*</b>  | <b>0.9819 (0.0004)</b> | <b>0.9506 (0.0029)</b>   | <b>0.9293 (0.0040)</b> |
| 2     | WES                   | 1                                                  | 0      | 0.9826 (0.0004)          | 0.9824 (0.0003)        | 0.9371 (0.0038)          | 0.9228 (0.0036)        |
| 2     | WEGS <sub>4P,2X</sub> | 4                                                  | 2      | <b>0.9835 (0.0002)</b>   | 0.9813 (0.0003)**      | <b>0.9450 (0.0062)</b>   | <b>0.9229 (0.0029)</b> |
| 2     | WEGS <sub>4P,5X</sub> | 4                                                  | 5      | <b>0.9849 (0.0002)**</b> | 0.9814 (0.0003)*       | <b>0.9519 (0.0040)*</b>  | <b>0.9271 (0.0035)</b> |
| 2     | WEGS <sub>8P,2X</sub> | 8                                                  | 2      | <b>0.9830 (0.0002)</b>   | 0.9811 (0.0004)**      | <b>0.9380 (0.0036)</b>   | 0.9223 (0.0038)        |
| 2     | WEGS <sub>8P,5X</sub> | 8                                                  | 5      | <b>0.9845 (0.0002)**</b> | 0.9812 (0.0003)**      | <b>0.9474 (0.0028)*</b>  | <b>0.9262 (0.0039)</b> |

**Supplementary Table 9. Average variant recall and precision rates in 30X WGS, 2X WGS, 5X WGS, WES, and WEGS.** The table represents variant calls inside the target regions in Agilent V7 capture and the GIAB high-confidence regions.

| Sequencing method     | SNVs         |             |              |                 |                 | InDels   |          |         |                 |                 |
|-----------------------|--------------|-------------|--------------|-----------------|-----------------|----------|----------|---------|-----------------|-----------------|
|                       | TP (SE)      | FP (SE)     | FN (SE)      | Precision (SE)  | Recall (SE)     | TP (SE)  | FP (SE)  | FN (SE) | Precision (SE)  | Recall (SE)     |
| 30X WGS               | 22,338 (19)  | 260 (5)     | 287 (5)      | 0.9885 (0.0002) | 0.9873 (0.0002) | 661 (5)  | 12 (1)   | 11 (1)  | 0.9823 (0.0017) | 0.9841 (0.0011) |
| 2X WGS                | 12,387 (433) | 3,158 (107) | 10,238 (399) | 0.7966 (0.0075) | 0.5474 (0.0183) | 359 (10) | 257 (13) | 313 (5) | 0.5833 (0.0083) | 0.5344 (0.0040) |
| 5X WGS                | 17,347 (489) | 1,857 (57)  | 5,278 (466)  | 0.9031 (0.0052) | 0.7667 (0.0209) | 494 (20) | 280 (9)  | 177 (7) | 0.6398 (0.0161) | 0.7354 (0.0151) |
| WES                   | 22,241 (30)  | 406 (7)     | 384 (8)      | 0.9821 (0.0003) | 0.9830 (0.0004) | 631 (6)  | 53 (2)   | 41 (2)  | 0.9232 (0.0028) | 0.9390 (0.0029) |
| WEGS <sub>4P,2X</sub> | 22,268 (24)  | 426 (6)     | 357 (5)      | 0.9812 (0.0002) | 0.9842 (0.0002) | 638 (5)  | 51 (2)   | 34 (2)  | 0.9269 (0.0024) | 0.9493 (0.0028) |
| WEGS <sub>4P,5X</sub> | 22,291 (25)  | 427 (6)     | 334 (3)      | 0.9812 (0.0002) | 0.9852 (0.0001) | 642 (5)  | 49 (2)   | 30 (1)  | 0.9300 (0.0024) | 0.9552 (0.0019) |
| WEGS <sub>8P,2X</sub> | 22,247 (21)  | 421 (6)     | 376 (4)      | 0.9814 (0.0003) | 0.9834 (0.0002) | 633 (4)  | 52 (2)   | 40 (2)  | 0.9240 (0.0024) | 0.9407 (0.0026) |
| WEGS <sub>8P,5X</sub> | 22,277 (21)  | 418 (6)     | 346 (3)      | 0.9816 (0.0002) | 0.9847 (0.0001) | 638 (4)  | 50 (2)   | 34 (2)  | 0.9277 (0.0027) | 0.9490 (0.0020) |

**Supplementary Table 10. Average genome-wide variant recall and precision rates in 30X WGS, 2X WGS, 5X WGS, and WEGS.** The table represents variant calls in genetic regions overlapping with the GIAB high-confidence regions genome-wide.

| Sequencing method     | SNV                 |                  |                     |                 |                 | InDel            |                |                  |                 |                 |
|-----------------------|---------------------|------------------|---------------------|-----------------|-----------------|------------------|----------------|------------------|-----------------|-----------------|
|                       | TP (SE)             | FP (SE)          | FN (SE)             | Precision (SE)  | Recall (SE)     | TP (SE)          | FP (SE)        | FN (SE)          | Precision (SE)  | Recall (SE)     |
| 30X WGS               | 3,309,667 (4,295)   | 15,268 (174)     | 26,097 (82)         | 0.9954 (0.0001) | 0.9922 (0.0000) | 500,728 (2,382)  | 5,605 (35)     | 9,757 (111)      | 0.9889 (0.0001) | 0.9809 (0.0002) |
| 2X WGS                | 1,190,984 (108,702) | 322,983 (12,296) | 2,144,781 (117,113) | 0.7852 (0.0099) | 0.3572 (0.0336) | 115,029 (12,911) | 52,321 (4,272) | 395,456 (16,488) | 0.6860 (0.0069) | 0.2257 (0.0269) |
| 5X WGS                | 1,830,718 (144,541) | 250,804 (7,048)  | 1,505,046 (153,117) | 0.8780 (0.0113) | 0.5490 (0.0449) | 189,542 (19,319) | 65,847 (3,181) | 320,943 (22,545) | 0.7404 (0.0103) | 0.3718 (0.0404) |
| WEGS <sub>4P,2X</sub> | 1,333,840 (44,603)  | 303,452 (4,673)  | 2,001,925 (48,123)  | 0.8137 (0.0033) | 0.4000 (0.0138) | 132,918 (5,359)  | 56,441 (1,663) | 377,567 (6,801)  | 0.7010 (0.0025) | 0.2607 (0.0112) |
| WEGS <sub>4P,5X</sub> | 1,909,331 (58,921)  | 240,392 (3,054)  | 1,426,434 (62,566)  | 0.8869 (0.0043) | 0.5726 (0.0183) | 201,593 (7,908)  | 68,206 (1,221) | 308,892 (9,249)  | 0.7457 (0.0041) | 0.3954 (0.0166) |
| WEGS <sub>8P,2X</sub> | 1,326,086 (39,124)  | 307,039 (4,029)  | 2,008,327 (42,308)  | 0.8109 (0.0029) | 0.3979 (0.0121) | 131,783 (4,687)  | 56,193 (1,460) | 378,097 (6,013)  | 0.7001 (0.0022) | 0.2588 (0.0098) |
| WEGS <sub>8P,5X</sub> | 1,914,743 (51,710)  | 240,678 (2,681)  | 1,419,670 (54,999)  | 0.8870 (0.0038) | 0.5745 (0.0161) | 201,995 (6,927)  | 68,102 (1,067) | 307,885 (8,174)  | 0.7463 (0.0036) | 0.3967 (0.0146) |

**Supplementary Table 11. Precision and recall rates of variants imputed using the TOPMed reference panel inside WES target regions.** P - precision. R - recall. For WEGS, this table reports average numbers for each sample. Each sample was sequenced 4 times using WEGS<sub>4P,2X</sub>. HG002 and HG004 were sequenced 5 times using WEGS<sub>8P,5X</sub>. HG003 was sequenced 6 times using WEGS<sub>8P,5X</sub>. The percent of missed true variants is equal to (1 - recall) \* 100.

| Sample        | TOPMed imputed |       |     |        |        | WEGS 4P, 2X   |            |            |                    |                    | WEGS 8P, 5X   |                |            |                    |                    |
|---------------|----------------|-------|-----|--------|--------|---------------|------------|------------|--------------------|--------------------|---------------|----------------|------------|--------------------|--------------------|
|               | TP             | FN    | FP  | P      | R      | TP<br>(SE)    | FN<br>(SE) | FP<br>(SE) | P<br>(SE)          | R<br>(SE)          | TP<br>(SE)    | FN<br>(SE)     | FP<br>(SE) | P<br>(SE)          | R<br>(SE)          |
| <b>SNVs</b>   |                |       |     |        |        |               |            |            |                    |                    |               |                |            |                    |                    |
| HG002         | 21,458         | 1,285 | 165 | 0.9924 | 0.9435 | 22,379<br>(7) | 364<br>(7) | 446<br>(6) | 0.9805<br>(0.0002) | 0.9840<br>(0.0003) | 22,390<br>(5) | 353,449<br>(5) | (7)        | 0.9803<br>(0.0003) | 0.9845<br>(0.0002) |
| HG003         | 21,477         | 1,112 | 111 | 0.9949 | 0.9508 | 22,231<br>(9) | 358<br>(9) | 425<br>(4) | 0.9813<br>(0.0001) | 0.9841<br>(0.0004) | 22,249<br>(6) | 340,406<br>(6) | (5)        | 0.9821<br>(0.0002) | 0.9850<br>(0.0003) |
| HG004         | 21,228         | 1,315 | 181 | 0.9915 | 0.9417 | 22,195<br>(9) | 348<br>(9) | 406<br>(7) | 0.9820<br>(0.0003) | 0.9846<br>(0.0004) | 22,197<br>(5) | 346,402<br>(5) | (3)        | 0.9822<br>(0.0001) | 0.9847<br>(0.0002) |
| <b>InDels</b> |                |       |     |        |        |               |            |            |                    |                    |               |                |            |                    |                    |
| HG002         | 271            | 411   | 8   | 0.9713 | 0.3974 | 648<br>(3)    | 34<br>(3)  | 57<br>(1)  | 0.9197<br>(0.0017) | 0.9498<br>(0.0050) | 647<br>(2)    | 35<br>(2)      | 58<br>(3)  | 0.9177<br>(0.0038) | 0.9481<br>(0.0028) |
| HG003         | 257            | 433   | 8   | 0.9698 | 0.3725 | 649<br>(2)    | 41<br>(2)  | 52<br>(2)  | 0.9254<br>(0.0019) | 0.9409<br>(0.0027) | 651<br>(1)    | 39<br>(1)      | 52<br>(1)  | 0.9265<br>(0.0018) | 0.9432<br>(0.0019) |
| HG004         | 259            | 384   | 7   | 0.9738 | 0.4028 | 616<br>(2)    | 28<br>(2)  | 43<br>(2)  | 0.9357<br>(0.0035) | 0.9572<br>(0.0026) | 615<br>(2)    | 28<br>(2)      | 40<br>(2)  | 0.9393<br>(0.0033) | 0.9568<br>(0.0031) |

**Supplementary Table 12. Precision and recall rates of variants imputed using the TOPMed reference panel genome-wide.** P - precision. R - recall. For WEGS, this table reports average numbers for each sample. Each sample was sequenced 4 times using WEGS<sub>4P,2X</sub>. HG002 and HG004 were sequenced 5 times using WEGS<sub>8P,5X</sub>. HG003 was sequenced 6 times using WEGS<sub>8P,5X</sub>. The percent of missed true variants is equal to (1 - recall) \* 100.

| Sample        | TOPMed imputed |        |        | WEGS 4P,2X            |                    |                    | WEGS 8P,5X           |                    |                    |
|---------------|----------------|--------|--------|-----------------------|--------------------|--------------------|----------------------|--------------------|--------------------|
|               | TP             | P      | R      | TP<br>(SE)            | P<br>(SE)          | R<br>(SE)          | TP<br>(SE)           | P<br>(SE)          | R<br>(SE)          |
| <b>SNVs</b>   |                |        |        |                       |                    |                    |                      |                    |                    |
| HG002         | 3,212,631      | 0.9934 | 0.9582 | 1,323,307<br>(13,949) | 0.8183<br>(0.0023) | 0.3947<br>(0.0042) | 1,873,500<br>(1,770) | 0.8853<br>(0.0002) | 0.5588<br>(0.0005) |
| HG003         | 3,181,715      | 0.9947 | 0.96   | 1,518,733<br>(9,194)  | 0.8236<br>(0.0013) | 0.4583<br>(0.0028) | 2,151,757<br>(2,243) | 0.9040<br>(0.0002) | 0.6493<br>(0.0007) |
| HG004         | 3,202,593      | 0.9936 | 0.9587 | 1,159,478<br>(6,227)  | 0.7991<br>(0.0011) | 0.3471<br>(0.0019) | 1,671,569<br>(3,941) | 0.8684<br>(0.0005) | 0.5004<br>(0.0012) |
| <b>InDels</b> |                |        |        |                       |                    |                    |                      |                    |                    |
| HG002         | 199,347        | 0.9896 | 0.3816 | 132,493<br>(1,957)    | 0.7043<br>(0.0008) | 0.2536<br>(0.0037) | 198,767 (351)        | 0.7447<br>(0.0003) | 0.3805<br>(0.0007) |
| HG003         | 195,885        | 0.9909 | 0.3911 | 154,695<br>(1,172)    | 0.7091<br>(0.0003) | 0.3089<br>(0.0023) | 232,882 (368)        | 0.7624<br>(0.0002) | 0.4650<br>(0.0007) |
| HG004         | 197,298        | 0.9899 | 0.3882 | 111,566 (788)         | 0.6897<br>(0.0004) | 0.2195<br>(0.0015) | 168,158 (651)        | 0.7287<br>(0.0002) | 0.3308<br>(0.0013) |

**Supplementary Table 13. Imputed variants, their allele frequencies, and overlap with true positive (TP) variants in WEGS outside WES target regions.** The arrows  $\uparrow$  and  $\downarrow$  denote the increase and decrease in AF fold-change (AF ASJ / AF TOPMed) compared to variants where the number of imputed alleles matched the number of true alleles.

| Sample | # of imputed alleles vs # of true alleles | N imputed variants | Median AF (Q1-Q3)      |                        | Fold-change                         | Mean % of variants which were TP in WEGS (SE) |                 |
|--------|-------------------------------------------|--------------------|------------------------|------------------------|-------------------------------------|-----------------------------------------------|-----------------|
|        |                                           |                    | ASJ                    | TOPMed                 |                                     | WEGS 4P,2X                                    | WEGS 8P,5X      |
| HG002  | Same                                      | 3,258,732          | 0.460<br>(0.239-0.703) | 0.442<br>(0.231-0.680) | 1.042<br>(0.925-1.197)              | 38.44<br>(0.42)                               | 55.16<br>(0.05) |
| HG002  | Smaller                                   | 15,233             | 0.234<br>(0.059-0.483) | 0.215<br>(0.043-0.453) | $\uparrow$ 1.136<br>(0.926-1.509)   | 41.85<br>(0.48)                               | 59.31<br>(0.11) |
| HG002  | Greater                                   | 17,161             | 0.329<br>(0.147-0.536) | 0.340<br>(0.157-0.539) | $\downarrow$ 1.007<br>(0.840-1.209) | 90.55<br>(0.05)                               | 92.75<br>(0.02) |
| HG003  | Same                                      | 3,225,810          | 0.461<br>(0.239-0.704) | 0.443<br>(0.231-0.681) | 1.043<br>(0.927-1.198)              | 44.84<br>(0.28)                               | 64.45<br>(0.07) |
| HG003  | Smaller                                   | 12,665             | 0.222<br>(0.051-0.496) | 0.215<br>(0.033-0.458) | $\uparrow$ 1.129<br>(0.930-1.537)   | 46.75<br>(0.34)                               | 67.09<br>(0.08) |
| HG003  | Greater                                   | 13,855             | 0.302<br>(0.134-0.477) | 0.318<br>(0.145-0.501) | $\downarrow$ 1.006<br>(0.822-1.210) | 92.38<br>(0.04)                               | 94.60<br>(0.03) |
| HG004  | Same                                      | 3,247,624          | 0.457<br>(0.237-0.702) | 0.440<br>(0.230-0.679) | 1.041<br>(0.923-1.196)              | 33.65<br>(0.19)                               | 49.22<br>(0.12) |
| HG004  | Smaller                                   | 15,357             | 0.219<br>(0.056-0.465) | 0.205<br>(0.042-0.440) | $\uparrow$ 1.114<br>(0.915-1.565)   | 38.89<br>(0.30)                               | 55.00<br>(0.12) |
| HG004  | Greater                                   | 16,457             | 0.325<br>(0.142-0.534) | 0.330<br>(0.153-0.539) | $\downarrow$ 1.022<br>(0.841-1.239) | 89.38<br>(0.05)                               | 91.94<br>(0.02) |

**Supplementary Table 14. Precision and recall rates of GLIMPSE-imputed and called variants combined when using WEGS.** P - precision. R - recall. This table reports the average number for each sample. Each sample was sequenced 4 times using WEGS<sub>4P,2X</sub>. HG002 and HG004 were sequenced 5 times using WEGS<sub>8P,5X</sub>. HG003 was sequenced 6 times using WEGS<sub>8P,5X</sub>. The WES target regions are based on the Agilent V7 capture. Only variants inside the GIAB high-confidence regions were used for estimating precision and recall rates. The percent of missed true variants equals  $(1 - \text{recall}) * 100$ . The local imputation reference panel combines haplotypes from the 1000 Genomes Project and Human Genome Diversity Project (see Methods). The precision and recall rates for imputed variants when using low depth WGS data only are in Supplementary Tables 20 and 21.

| Sample                              | GLIMPSE-imputed + called WEGS 4P,2X |                      |                  |                    |                    | GLIMPSE-imputed + called WEGS 8P,5X |                    |                  |                    |                    |
|-------------------------------------|-------------------------------------|----------------------|------------------|--------------------|--------------------|-------------------------------------|--------------------|------------------|--------------------|--------------------|
|                                     | TP<br>(SE)                          | FN<br>(SE)           | FP<br>(SE)       | P<br>(SE)          | R<br>(SE)          | TP<br>(SE)                          | FN<br>(SE)         | FP<br>(SE)       | P<br>(SE)          | R<br>(SE)          |
| <i>SNVs genome-wide</i>             |                                     |                      |                  |                    |                    |                                     |                    |                  |                    |                    |
| HG002                               | 2,453,91<br>2 (7,229)               | 898,768<br>(7,229)   | 135,769<br>(624) | 0.9476<br>(0.0004) | 0.7319<br>(0.0022) | 2,766,979<br>(947)                  | 585,700<br>(947)   | 121,292<br>(298) | 0.9580<br>(0.0001) | 0.8253<br>(0.0003) |
| HG003                               | 2,671,67<br>0 (3,330)               | 642,473<br>(3,330)   | 149,397<br>(194) | 0.9470<br>(0.0001) | 0.8061<br>(0.0010) | 2,941,974<br>(658)                  | 372,168<br>(658)   | 111,323<br>(132) | 0.9635<br>(0.0000) | 0.8877<br>(0.0002) |
| HG004                               | 2,288,27<br>2 (2,807)               | 1,052,199<br>(2,807) | 134,772<br>(174) | 0.9444<br>(0.0001) | 0.6850<br>(0.0008) | 2,627,490<br>(1,760)                | 712,981<br>(1,760) | 124,847<br>(343) | 0.9546<br>(0.0001) | 0.7866<br>(0.0005) |
| <i>InDels genome-wide</i>           |                                     |                      |                  |                    |                    |                                     |                    |                  |                    |                    |
| HG002                               | 232,386<br>(1,580)                  | 290,004<br>(1,580)   | 47,280<br>(661)  | 0.8310<br>(0.0010) | 0.4449<br>(0.0030) | 285,889<br>(275)                    | 236,500<br>(275)   | 60,931<br>(123)  | 0.8243<br>(0.0002) | 0.5473<br>(0.0005) |
| HG003                               | 254,637<br>(814)                    | 246,156<br>(814)     | 53,284<br>(451)  | 0.8270<br>(0.0008) | 0.5085<br>(0.0016) | 308,620<br>(243)                    | 192,173<br>(243)   | 64,760<br>(153)  | 0.8266<br>(0.0002) | 0.6163<br>(0.0005) |
| HG004                               | 209,493<br>(584)                    | 298,781<br>(584)     | 42,164<br>(395)  | 0.8325<br>(0.0009) | 0.4122<br>(0.0011) | 258,240<br>(489)                    | 250,034<br>(489)   | 55,351<br>(264)  | 0.8235<br>(0.0004) | 0.5081<br>(0.0010) |
| <i>SNVs inside target regions</i>   |                                     |                      |                  |                    |                    |                                     |                    |                  |                    |                    |
| HG002                               | 22,422<br>(1)                       | 321<br>(1)           | 442<br>(7)       | 0.9807<br>(0.0003) | 0.9859<br>(0.0001) | 22,432<br>(5)                       | 311<br>(5)         | 446<br>(8)       | 0.9805<br>(0.0003) | 0.9863<br>(0.0002) |
| HG003                               | 22,291<br>(3)                       | 298<br>(3)           | 422<br>(5)       | 0.9814<br>(0.0002) | 0.9868<br>(0.0001) | 22,301<br>(4)                       | 288<br>(4)         | 404<br>(4)       | 0.9822<br>(0.0002) | 0.9872<br>(0.0002) |
| HG004                               | 22,246<br>(6)                       | 298<br>(6)           | 402<br>(6)       | 0.9823<br>(0.0003) | 0.9868<br>(0.0003) | 22,240<br>(3)                       | 303<br>(3)         | 398<br>(3)       | 0.9824<br>(0.0001) | 0.9865<br>(0.0001) |
| <i>InDels inside target regions</i> |                                     |                      |                  |                    |                    |                                     |                    |                  |                    |                    |
| HG002                               | 649<br>(3)                          | 33<br>(3)            | 58<br>(2)        | 0.9185<br>(0.0025) | 0.9512<br>(0.0045) | 647<br>(2)                          | 35<br>(2)          | 59<br>(3)        | 0.9165<br>(0.0038) | 0.9490<br>(0.0024) |
| HG003                               | 649<br>(1)                          | 41<br>(1)            | 54<br>(2)        | 0.9241<br>(0.0019) | 0.9409<br>(0.0018) | 652<br>(1)                          | 38<br>(1)          | 52<br>(1)        | 0.9259<br>(0.0019) | 0.9447<br>(0.0014) |
| HG004                               | 618<br>(1)                          | 25<br>(1)            | 42<br>(2)        | 0.9363<br>(0.0032) | 0.9615<br>(0.0022) | 619<br>(2)                          | 24<br>(2)          | 40<br>(2)        | 0.9402<br>(0.0034) | 0.9633<br>(0.0028) |

**Supplementary Table 15. Precision and recall rates of variants imputed using the GLIMPSE method and WEGS.** P - precision. R - recall. This table reports the average number for each sample. Each sample was sequenced 4 times using WEGS4P,2X. HG002 and HG004 were sequenced 5 times using WEGS8P,5X. HG003 was sequenced 6 times using WEGS8P,5X. The WES target regions are based on the Agilent V7 capture. Only variants inside the GIAB high-confidence regions were used for estimating precision and recall rates. The percent of missed true variants equals  $(1 - \text{recall}) * 100$ . The local imputation reference panel combines haplotypes from the 1000 Genomes Project and Human Genome Diversity Project (see Methods). The precision and recall rates for imputed variants when using low depth WGS data only are in Supplementary Tables 20 and 21.

| Sample                                    | GLIMPSE-imputed WEGS 4P,2X |                      |                 |                    |                    | GLIMPSE-imputed WEGS 8P,5X |                    |                |                    |                    |
|-------------------------------------------|----------------------------|----------------------|-----------------|--------------------|--------------------|----------------------------|--------------------|----------------|--------------------|--------------------|
|                                           | TP<br>(SE)                 | FN<br>(SE)           | FP<br>(SE)      | P<br>(SE)          | R<br>(SE)          | TP<br>(SE)                 | FN<br>(SE)         | FP<br>(SE)     | P<br>(SE)          | R<br>(SE)          |
| <i>SNVs genome-wide</i>                   |                            |                      |                 |                    |                    |                            |                    |                |                    |                    |
| HG002                                     | 2,374,106<br>(5,976)       | 978,573<br>(5,976)   | 14,526<br>(105) | 0.9939<br>(0.0001) | 0.7081<br>(0.0018) | 2,650,201<br>(769)         | 702,478<br>(769)   | 11,347<br>(20) | 0.9957<br>(0.0000) | 0.7905<br>(0.0002) |
| HG003                                     | 2,585,159<br>(2,514)       | 728,984<br>(2,514)   | 14,954<br>(78)  | 0.9942<br>(0.0000) | 0.7800<br>(0.0008) | 2,814,345<br>(432)         | 499,798<br>(432)   | 10,790<br>(23) | 0.9962<br>(0.0000) | 0.8492<br>(0.0001) |
| HG004                                     | 2,220,297<br>(2,243)       | 1,120,174<br>(2,243) | 15,322<br>(56)  | 0.9931<br>(0.0000) | 0.6647<br>(0.0007) | 2,526,333<br>(1,400)       | 814,138<br>(1,400) | 12,130<br>(55) | 0.9952<br>(0.0000) | 0.7563<br>(0.0004) |
| <i>InDels genome-wide</i>                 |                            |                      |                 |                    |                    |                            |                    |                |                    |                    |
| HG002                                     | 173,796<br>(456)           | 348,592<br>(456)     | 1,960<br>(20)   | 0.9889<br>(0.0001) | 0.3327<br>(0.0009) | 192,324<br>(58)            | 330,065<br>(58)    | 1,671<br>(8)   | 0.9914<br>(0.0000) | 0.3682<br>(0.0001) |
| HG003                                     | 186,398<br>(148)           | 314,395<br>(148)     | 1,923<br>(14)   | 0.9898<br>(0.0001) | 0.3722<br>(0.0003) | 200,140<br>(35)            | 300,653<br>(35)    | 1,611<br>(5)   | 0.9920<br>(0.0000) | 0.3996<br>(0.0001) |
| HG004                                     | 161,474<br>(133)           | 346,800<br>(133)     | 1,878<br>(4)    | 0.9885<br>(0.0000) | 0.3177<br>(0.0003) | 181,722<br>(101)           | 326,552<br>(101)   | 1,725<br>(7)   | 0.9906<br>(0.0000) | 0.3575<br>(0.0002) |
| <i>SNVs inside WES targeted regions</i>   |                            |                      |                 |                    |                    |                            |                    |                |                    |                    |
| HG002                                     | 20,875<br>(1)              | 1,868<br>(1)         | 30<br>(1)       | 0.9986<br>(0.0000) | 0.9179<br>(0.0000) | 20,878<br>(1)              | 1,865<br>(1)       | 31<br>(2)      | 0.9985<br>(0.0001) | 0.9180<br>(0.0001) |
| HG003                                     | 20,869<br>(1)              | 1,720<br>(1)         | 29<br>(1)       | 0.9986<br>(0.0000) | 0.9239<br>(0.0000) | 20,871<br>(1)              | 1,718<br>(1)       | 29<br>(1)      | 0.9986<br>(0.0000) | 0.9240<br>(0.0000) |
| HG004                                     | 20,746<br>(2)              | 1,797<br>(2)         | 28<br>(1)       | 0.9987<br>(0.0000) | 0.9203<br>(0.0001) | 20,746<br>(1)              | 1,797<br>(1)       | 29<br>(1)      | 0.9986<br>(0.0000) | 0.9203<br>(0.0000) |
| <i>InDels inside WES targeted regions</i> |                            |                      |                 |                    |                    |                            |                    |                |                    |                    |
| HG002                                     | 308<br>(0)                 | 374<br>(0)           | 4<br>(1)        | 0.9856<br>(0.0021) | 0.4509<br>(0.0004) | 307<br>(0)                 | 375<br>(0)         | 4<br>(0)       | 0.9859<br>(0.0013) | 0.4504<br>(0.0003) |
| HG003                                     | 292<br>(0)                 | 398<br>(0)           | 2<br>(0)        | 0.9932<br>(0.0000) | 0.4232<br>(0.0000) | 293<br>(0)                 | 397<br>(0)         | 2<br>(0)       | 0.9932<br>(0.0000) | 0.4242<br>(0.0003) |
| HG004                                     | 306<br>(0)                 | 337<br>(0)           | 2<br>(0)        | 0.9935<br>(0.0000) | 0.4755<br>(0.0004) | 306<br>(0)                 | 337<br>(0)         | 2<br>(0)       | 0.9922<br>(0.0008) | 0.4759<br>(0.0007) |

**Supplementary Table 16. Precision and recall rates of variants imputed using the Minimac4 method genome-wide.** The percent of missed true variants equals  $(1 - \text{recall}) * 100$ . The local imputation reference panel combines haplotypes from the 1000 Genomes Project and Human Genome Diversity Project (see Methods).

| Sample | Minimac4-imputed SNVs |         |         |           |        | Minimac4-imputed InDels |         |        |           |        |
|--------|-----------------------|---------|---------|-----------|--------|-------------------------|---------|--------|-----------|--------|
|        | TP                    | FN      | FP      | Precision | Recall | TP                      | FN      | FP     | Precision | Recall |
| HG002  | 2,942,195             | 410,484 | 316,718 | 0.9028    | 0.8776 | 326,360                 | 196,029 | 47,144 | 0.8738    | 0.6247 |
| HG003  | 2,908,634             | 405,509 | 317,430 | 0.9016    | 0.8776 | 317,001                 | 183,792 | 46,494 | 0.8721    | 0.633  |
| HG004  | 2,934,901             | 405,570 | 313,069 | 0.9036    | 0.8786 | 320,526                 | 187,748 | 45,098 | 0.8767    | 0.6306 |

**Supplementary Table 17. Overview of genome-wide significant loci associated with peripheral artery disease (PAD) in the 862 WEGS sequenced patients.** Abbreviations: chr-chromosome; alt-alternative; ref-reference; freq-frequency; EUR-Europeans; AA-African Americans; EAS-East Asians; DP-average depth; GSA-global screening array (24v3). This table reports the allele frequency and average depth of known genome-wide significant peripheral artery disease loci in the WEGS. The ancestry specific frequency was derived from gnomAD (v3.1.2).

| rsid        | chr | position  | Alt | Ref | Alt Freq | EUR Freq | AA Freq | EAS Freq | MID Freq | DP  | Annotation                | Gene /Locus                 | Present on the GSA array |
|-------------|-----|-----------|-----|-----|----------|----------|---------|----------|----------|-----|---------------------------|-----------------------------|--------------------------|
| rs7528419   | 1   | 109274570 | G   | A   | 0.16     | 0.22     | 0.27    | 0.06     | 0.10     | 7   | 3' UTR variant            | <i>CELSR2/SO<br/>RT1</i>    | +                        |
| rs6025      | 1   | 169549811 | T   | C   | 0.05     | 0.03     | 0.004   | 0.000    | 0.06     | 44  | Missense variant          | <i>F5</i>                   | +                        |
| rs118039278 | 6   | 160564494 | A   | G   | 0.08     | 0.07     | 0.01    | 0.001    | 0.01     | 7   | Intron variant            | <i>LPA</i>                  | -                        |
| rs3130968   | 6   | 31097294  | T   | C   | 0.11     | 0.14     | 0.15    | 0.001    | 0.05     | 9   | Regulatory region variant | <i>HLA-B</i>                | -                        |
| rs2107595   | 7   | 19009765  | A   | G   | 0.14     | 0.16     | 0.21    | 0.34     | 0.22     | 5   | Regulatory region variant | <i>HDAC9</i>                | -                        |
| rs4722172   | 7   | 22746913  | A   | G   | 0.74     | 0.79     | 0.96    | 1.000    | 0.91     | 7   | Intergenic variant        | <i>IL6</i>                  | -                        |
| rs322       | 8   | 19961706  | C   | A   | 0.22     | 0.27     | 0.40    | 0.20     | 0.28     | 4   | Intron variant            | <i>LPL</i>                  | -                        |
| rs505922    | 9   | 133273813 | T   | C   | 0.56     | 0.65     | 0.65    | 0.56     | 0.66     | 7   | Intron variant            | <i>ABO</i>                  | +                        |
| rs1537372   | 9   | 22103184  | T   | G   | 0.35     | 0.48     | 0.14    | 0.52     | 0.63     | 6   | Intron variant            | <i>CDKN2B-<br/>AS1/9p21</i> | -                        |
| rs7903146   | 10  | 112998590 | T   | C   | 0.17     | 0.29     | 0.29    | 0.03     | 0.40     | 3   | Intron variant            | <i>TCF7L2</i>               | +                        |
| rs7476      | 11  | 46321284  | C   | A   | 0.22     | 0.21     | 0.84    | 0.46     | 0.41     | 4   | Intron variant            | <i>MMP3</i>                 | -                        |
| rs566125    | 11  | 102839740 | T   | C   | 0.12     | 0.13     | 0.02    | 0.07     | 0.13     | 5   | 3' UTR variant            | <i>CREB3L1</i>              | -                        |
| rs4842266   | 12  | 79557786  | A   | G   | 0.50     | 0.44     | 0.07    | 0.002    | 0.37     | 4   | Intron variant            | <i>PTPN11</i>               | +                        |
| rs11066301  | 12  | 112433568 | G   | A   | 0.34     | 0.44     | 0.07    | 0.002    | 0.37     | 111 | Upstream gene variant     | <i>RP11-<br/>359M6.3</i>    | -                        |
| rs1975514   | 13  | 110176544 | C   | T   | 0.37     | 0.37     | 0.28    | 0.30     | 0.31     | 8   | Intron variant            | <i>COL4A1</i>               | -                        |
| rs55784307  | 14  | 70034647  | A   | C   | 0.15     | 0.18     | 0.05    | 0.39     | 0.13     | 5   | Downstream gene variant   | <i>SMO1</i>                 | +                        |
| rs10851907  | 15  | 78623522  | A   | G   | 0.34     | 0.42     | 0.43    | 0.07     | 0.44     | 5   | Upstream gene variant     | <i>CHRNA3</i>               | -                        |
| rs138294113 | 19  | 11081053  | T   | C   | 0.09     | 0.12     | 0.14    | 0.01     | 0.16     | 6   | Intergenic variant        | <i>LDLR</i>                 | -                        |



**Supplementary Table 18. Genome-wide significant loci associated with peripheral artery disease (PAD) and the number of variants within the loci present in WEGS and TOPMed.** For each locus, we counted the number of variants surrounding the lead variant (rsid) within  $\pm 500$  kilobase (kb) distance.

| rsid        | chr | position  | # of SNVs in WEGS | # of SNVs in TOPMed | # of WEGS SNVs absent from TOPMed |       |           |             |            |         |
|-------------|-----|-----------|-------------------|---------------------|-----------------------------------|-------|-----------|-------------|------------|---------|
|             |     |           |                   |                     | Total                             | Synon | Non-synon | Stop/Splice | Frameshift | Inframe |
| rs7528419   | 1   | 109274570 | 17,631            | 258,859             | 4,481                             | 17    | 35        | 2           | 2          | 0       |
| rs6025      | 1   | 169549811 | 14,663            | 254,419             | 3,310                             | 9     | 8         | 3           | 0          | 0       |
| rs118039278 | 6   | 160564494 | 15,028            | 272,156             | 3,141                             | 1     | 17        | 0           | 0          | 0       |
| rs3130968   | 6   | 31097294  | 32,930            | 255,957             | 6,085                             | 24    | 64        | 5           | 10         | 10      |
| rs2107595   | 7   | 19009765  | 14,424            | 322,455             | 2,379                             | 4     | 2         | 0           | 0          | 0       |
| rs4722172   | 7   | 22746913  | 15,796            | 276,263             | 3,505                             | 3     | 7         | 1           | 3          | 0       |
| rs322       | 8   | 19961706  | 17333             | 333,151             | 3,251                             | 4     | 10        | 1           | 0          | 0       |
| rs505922    | 9   | 133273813 | 14,233            | 290,358             | 4,274                             | 9     | 29        | 1           | 1          | 3       |
| rs1537372   | 9   | 22103184  | 20,034            | 324,269             | 2,731                             | 3     | 2         | 0           | 0          | 0       |
| rs7903146   | 10  | 112998590 | 14,599            | 268,399             | 3,304                             | 1     | 3         | 0           | 0          | 0       |
| rs566125    | 11  | 46321284  | 16,485            | 262,361             | 4,932                             | 8     | 34        | 1           | 0          | 0       |
| rs7476      | 11  | 102839740 | 15,023            | 274,797             | 3,198                             | 4     | 23        | 0           | 1          | 0       |
| rs11066301  | 12  | 79557786  | 55,094            | 262,291             | 3,143                             | 1     | 3         | 0           | 0          | 0       |
| rs4842266   | 12  | 112433568 | 16,233            | 250,632             | 5,016                             | 3     | 9         | 2           | 0          | 0       |
| rs1975514   | 13  | 110176544 | 17,779            | 288,888             | 3,274                             | 7     | 25        | 1           | 0          | 2       |
| rs55784307  | 14  | 70034647  | 15,766            | 264,425             | 3,387                             | 4     | 12        | 0           | 0          | 0       |
| rs10851907  | 15  | 78623522  | 18,510            | 275,484             | 4,514                             | 7     | 25        | 1           | 0          | 2       |
| rs62084752  | 17  | 68093252  | 21,373            | 285,583             | 5,903                             | 7     | 11        | 0           | 2          | 0       |
| rs138294113 | 19  | 11081053  | 25,994            | 306,166             | 7,227                             | 21    | 34        | 3           | 4          | 2       |

**Supplementary Table 19. Precision and recall rates of variants imputed from 2X and 5X WGS using the GLIMPSE method.** P - precision. R – recall. Each sample was sequenced one time using 5X WGS with reads split into two lanes. The WES target regions are based on the Agilent V7 capture. Only variants inside the GIAB high-confidence regions were used for estimating precision and recall rates. The percent of missed true variants equals  $(1 - \text{recall}) * 100$ . The local imputation reference panel combines haplotypes from the 1000 Genomes Project and Human Genome Diversity Project (see Methods).

| Sample                                  | GLIMPSE-imputed 2X WGS |           |        |        |        | GLIMPSE-imputed 5X WGS |         |        |        |        |
|-----------------------------------------|------------------------|-----------|--------|--------|--------|------------------------|---------|--------|--------|--------|
|                                         | TP                     | FN        | FP     | P      | R      | TP                     | FN      | FP     | P      | R      |
| <i>SNVs genome-wide</i>                 |                        |           |        |        |        |                        |         |        |        |        |
| HG002                                   | 2,307,826              | 1,044,853 | 15,652 | 0.9933 | 0.6884 | 2,623,366              | 729,313 | 11,810 | 0.9955 | 0.7825 |
| HG003                                   | 2,542,792              | 771,351   | 15,847 | 0.9938 | 0.7673 | 2,801,288              | 512,855 | 11,235 | 0.9960 | 0.8453 |
| HG004                                   | 2,141,392              | 1,199,079 | 16,572 | 0.9923 | 0.6410 | 2,493,060              | 847,411 | 12,636 | 0.9950 | 0.7463 |
| <i>InDels genome-wide</i>               |                        |           |        |        |        |                        |         |        |        |        |
| HG002                                   | 168,584                | 353,805   | 1,995  | 0.9883 | 0.3227 | 190,138                | 332,251 | 1,753  | 0.9909 | 0.364  |
| HG003                                   | 183,474                | 317,319   | 2,039  | 0.9890 | 0.3664 | 199,136                | 301,657 | 1,670  | 0.9917 | 0.3976 |
| HG004                                   | 155,368                | 352,906   | 1,941  | 0.9877 | 0.3057 | 179,054                | 329,220 | 1,779  | 0.9902 | 0.3523 |
| <i>SNVs inside WES target regions</i>   |                        |           |        |        |        |                        |         |        |        |        |
| HG002                                   | 18,993                 | 3,750     | 130    | 0.9932 | 0.8351 | 19,966                 | 2,777   | 86     | 0.9957 | 0.8779 |
| HG003                                   | 19,594                 | 2,995     | 157    | 0.9921 | 0.8674 | 20,467                 | 2,122   | 85     | 0.9959 | 0.9061 |
| HG004                                   | 18,360                 | 4,183     | 152    | 0.9918 | 0.8144 | 19,509                 | 3,034   | 91     | 0.9954 | 0.8654 |
| <i>InDels inside WES target regions</i> |                        |           |        |        |        |                        |         |        |        |        |
| HG002                                   | 285                    | 397       | 13     | 0.9564 | 0.4179 | 296                    | 386     | 12     | 0.9610 | 0.434  |
| HG003                                   | 275                    | 415       | 9      | 0.9683 | 0.3986 | 285                    | 405     | 9      | 0.9694 | 0.413  |
| HG004                                   | 275                    | 368       | 11     | 0.9617 | 0.4277 | 288                    | 355     | 10     | 0.9666 | 0.4479 |

**Supplementary Table 20. Precision and recall rates of GLIMPSE-imputed and called variants combined when using 2X and 5X WGS.** P - precision. R – recall. Each sample was sequenced one time using 5X WGS with reads split into two lanes. The WES target regions are based on the Agilent V7 capture. Only variants inside the GIAB high-confidence regions were used for estimating precision and recall rates. The percent of missed true variants equals  $(1 - \text{recall}) * 100$ . The local imputation reference panel combines haplotypes from the 1000 Genomes Project and Human Genome Diversity Project (see Methods).

| Sample                                  | GLIMPSE-imputed + called 2X WGS |           |         |        |        | GLIMPSE-imputed + called 5X WGS |         |         |        |        |
|-----------------------------------------|---------------------------------|-----------|---------|--------|--------|---------------------------------|---------|---------|--------|--------|
|                                         | TP                              | FN        | FP      | P      | R      | TP                              | FN      | FP      | P      | R      |
| <i>SNVs genome-wide</i>                 |                                 |           |         |        |        |                                 |         |         |        |        |
| HG002                                   | 2,375,840                       | 976,839   | 144,901 | 0.9425 | 0.7086 | 2,734,168                       | 618,511 | 125,112 | 0.9562 | 0.8155 |
| HG003                                   | 2,618,513                       | 695,630   | 158,730 | 0.9428 | 0.7901 | 2,923,651                       | 390,492 | 114,796 | 0.9622 | 0.8822 |
| HG004                                   | 2,197,878                       | 1,142,593 | 142,826 | 0.939  | 0.6580 | 2,588,113                       | 752,358 | 128,663 | 0.9526 | 0.7748 |
| <i>InDels genome-wide</i>               |                                 |           |         |        |        |                                 |         |         |        |        |
| HG002                                   | 217,227                         | 305,162   | 42,767  | 0.8355 | 0.4158 | 277,580                         | 244,809 | 58,603  | 0.8257 | 0.5314 |
| HG003                                   | 243,239                         | 257,554   | 49,387  | 0.8313 | 0.4857 | 302,734                         | 198,059 | 63,071  | 0.8276 | 0.6045 |
| HG004                                   | 194,140                         | 314,134   | 37,167  | 0.8393 | 0.3820 | 249,665                         | 258,609 | 52,795  | 0.8255 | 0.4912 |
| <i>SNVs inside WES target regions</i>   |                                 |           |         |        |        |                                 |         |         |        |        |
| HG002                                   | 19,763                          | 2,980     | 1,861   | 0.9139 | 0.8690 | 21,116                          | 1,627   | 1,315   | 0.9414 | 0.9285 |
| HG003                                   | 20,342                          | 2,247     | 2,092   | 0.9067 | 0.9005 | 21,517                          | 1,072   | 1,266   | 0.9444 | 0.9525 |
| HG004                                   | 19,069                          | 3,474     | 1,943   | 0.9075 | 0.8459 | 20,536                          | 2,007   | 1,324   | 0.9394 | 0.911  |
| <i>InDels inside WES target regions</i> |                                 |           |         |        |        |                                 |         |         |        |        |
| HG002                                   | 490                             | 192       | 274     | 0.6423 | 0.7185 | 571                             | 111     | 276     | 0.6749 | 0.8372 |
| HG003                                   | 483                             | 207       | 247     | 0.6616 | 0.7000 | 574                             | 116     | 267     | 0.6833 | 0.8319 |
| HG004                                   | 457                             | 186       | 231     | 0.6647 | 0.7107 | 527                             | 116     | 295     | 0.6442 | 0.8196 |
